# Supplementary material
Source: publisher figshare collection journal article supplement (https://aacr.figshare.com/articles/dataset/_/22536505)
Supplement: Supplementary file 1 [file 39999799]

Figure S1. Oral mucosa organoids can be established from mouse tongue epithelium.

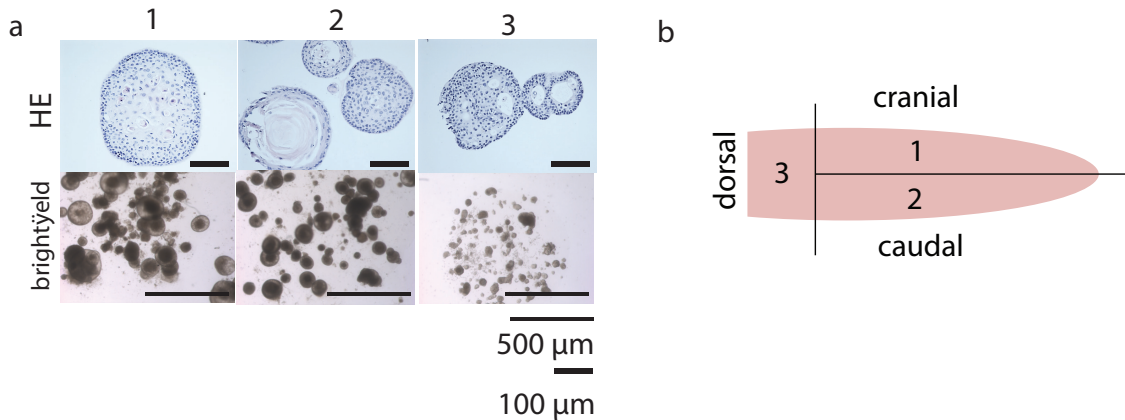

**Figure S1. Oral mucosa organoids can be established from mouse tongue epithelium, related to Figure 1.** A. brightfield microscopy images and H&E staining of paraffinembedded organoid sections of organoids established from different regions of the mouse tongue (annotated 1, 2 and 3, see schematic in B) Organoids keratinize at larger sized, revealed by darker centers in the brightfield images or acellular parts in the H&E staining. Scalebar top panels 100 micrometer, scalebar bottom panels 500 micrometer. B. Schematic of locations annotated 1, 2 and 3 in Figure S1A.

Figure S2. Outgrowth of human oral mucosa organoids and characterization using scanning electron microscopy and transmission electron microscopy.

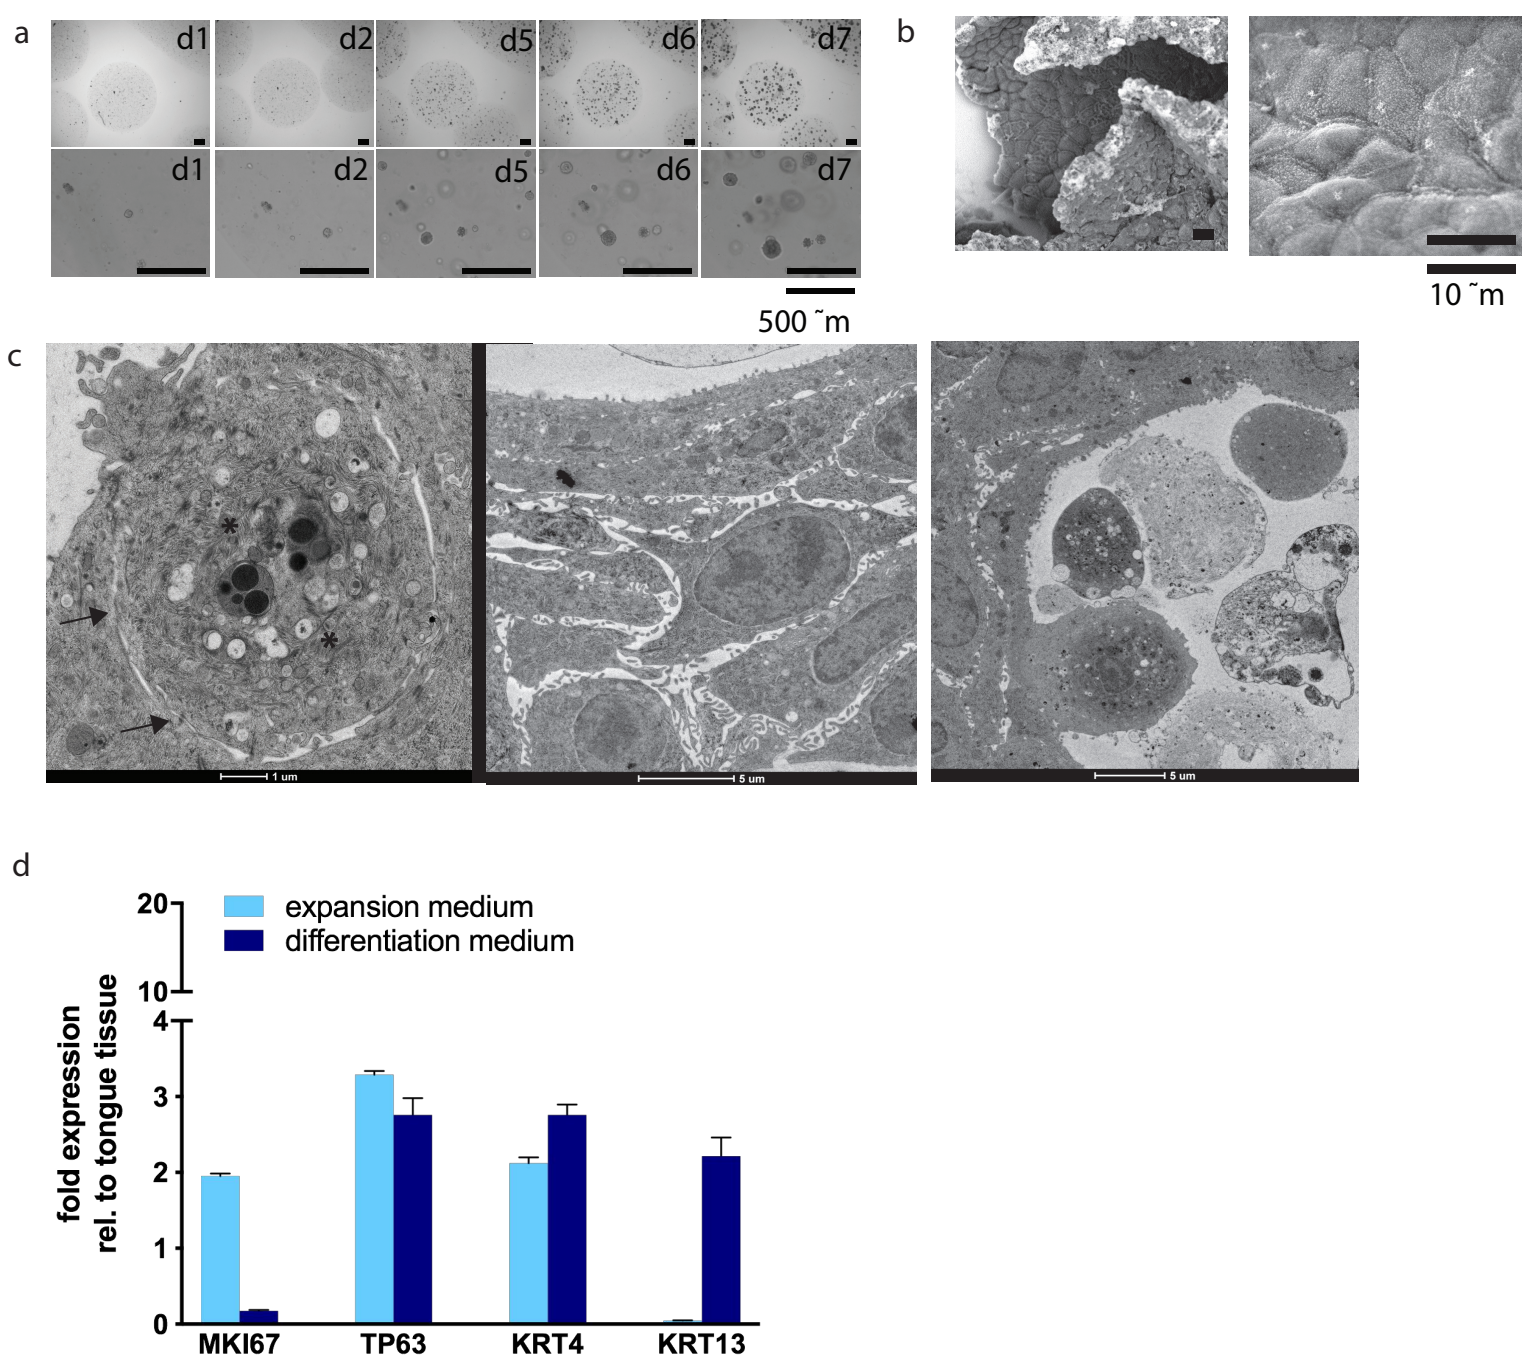

**Figure S2. Outgrowth of human oral mucosa organoids and characterization using scanning electron microscopy and transmission electron microscopy, related to Figure 1.** A. Organoid outgrowth can be observed from human primary tissue when put in culture. Representative images of establishment of an organoid culture. Starting one day after initial plating of the tissue, images of the same BME drop with human cells were taken on day 1, 2, 5, 6 and 7 to show outgrowth of organoids from primary tissue. Scalebar 500 micrometer. B. Scanning electron microscopy of human oral mucosa organoids. First panel: an organoid that broke open during processing shows the apical surface of organoid cells. Most cells have a smooth surface, whereas some cells have a folded apical surface. Second panel: zoom in of the apical surface of an organoid, showing multiple keratinocytes forming tight connections. Scalebar 10 micrometer C. Transmission electron microscopy images of human oral mucosa organoids. First panel: a single keratinocyte shows properties characteristic for keratinocytes, such as abundant tonofilament formation (asterixes) and tight junctions (arrows) connecting it to neighboring cells. Second panel: cross section spanning the apical part of the organoid wall. Cells located more towards the outside of the organoids are bigger, more rounded and have intact nuclei. Moving more towards the inside of the organoid, cells seem to flatten out, and lose their nucleus. Third panel, cross section showing the inside of an organoid, where cell fragments are still present. One keratinocyte is being shed into the inside of the structure. Scalebars are shown below each individual panel. D. Quantitative PCR of a normal oral mucosa organoid line (N8) for proliferation marker MKI67, basal cell marker TP63 and KRT13, Prior to RNA collection, growth factors were withdrawn from the medium to induce differentiation. Expression levels are calculated using delta Ct method. For each marker, fold change in expression is made relative to expression of this markers in human primary tongue tissue, which is set to 1. n=3, individual data points are shown, bars represent average.

Figure S3. Oral mucosa organoids can be infected with Herpes Simplex Virus and Human Papilloma Virus.

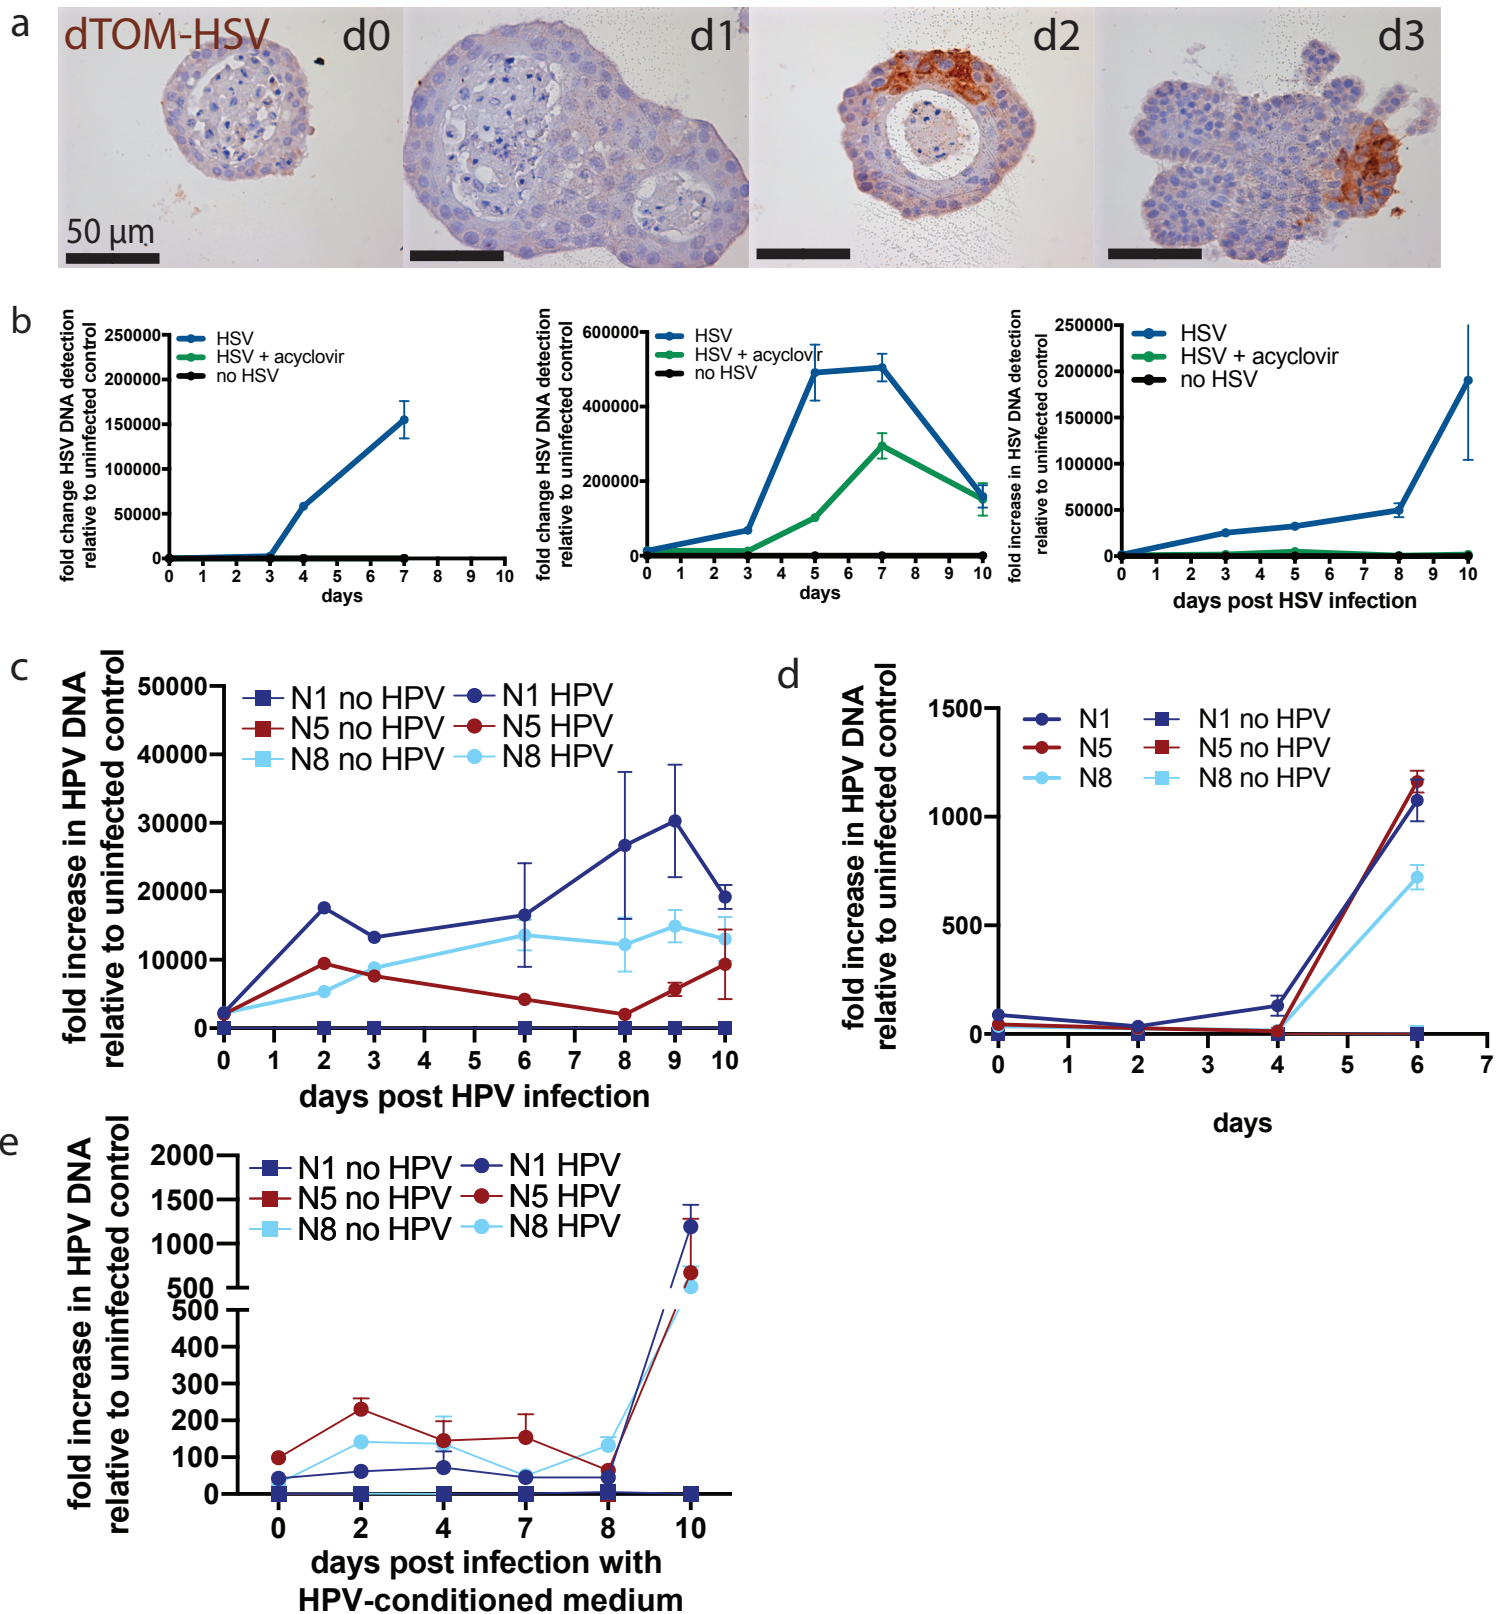

**Figure S3. Oral mucosa organoids can be infected with Herpes Simplex Virus and Human Papilloma Virus, related to Figure 1. A.** Immunohistochemical staining for dTomato was performed on organoids infected with dTomato labelled HSV (dTOM-HSV). Organoids were collected on day 0, 1, 2 and 3. Scalebar 50  $\mu$ m. **B.** Quantification of HSV DNA after infection of oral mucosa organoids derived from three different donors. Quantitative PCR of DNA obtained from oral mucosa organoids infected with HSV and kept in culture for 10 days. HSV can replicate in oral mucosa organoids, and this replication can be inhibited by the addition of acyclovir. Fold increase in DNA content is calculated relative to Ct values of the uninfected control at day 0, using delta Ct method. Datapoints represent the average of three technical replicates, error bars represent the SEM. Blue, organoids infected with HSV. Green, organoids infected with HSV and cultured in the presence of 1  $\mu$ M acyclovir. Black, organoids not infected with HSV. **C.** Quantification of HPV DNA after splitting of HPV-infected organoids. 10 days after initial infection (results shown in Figure 2F), organoids were split and plated to follow HPV DNA over time. Increase in HPV DNA could be observed six days after splitting in all three organoid lines. **D** and **E.** Quantitative PCR for HPV on DNA obtained from oral mucosa organoids infected with HPV (**D**) or HPV-conditioned medium (**E**) and kept in culture for a maximum 10 days. Fold increase in DNA content is shown relative to uninfected control at day 0. Data points represent the average of three technical replicates, error bars represent the SEM.

Figure S4. Brightfield images of HNSCC-derived organoid lines.

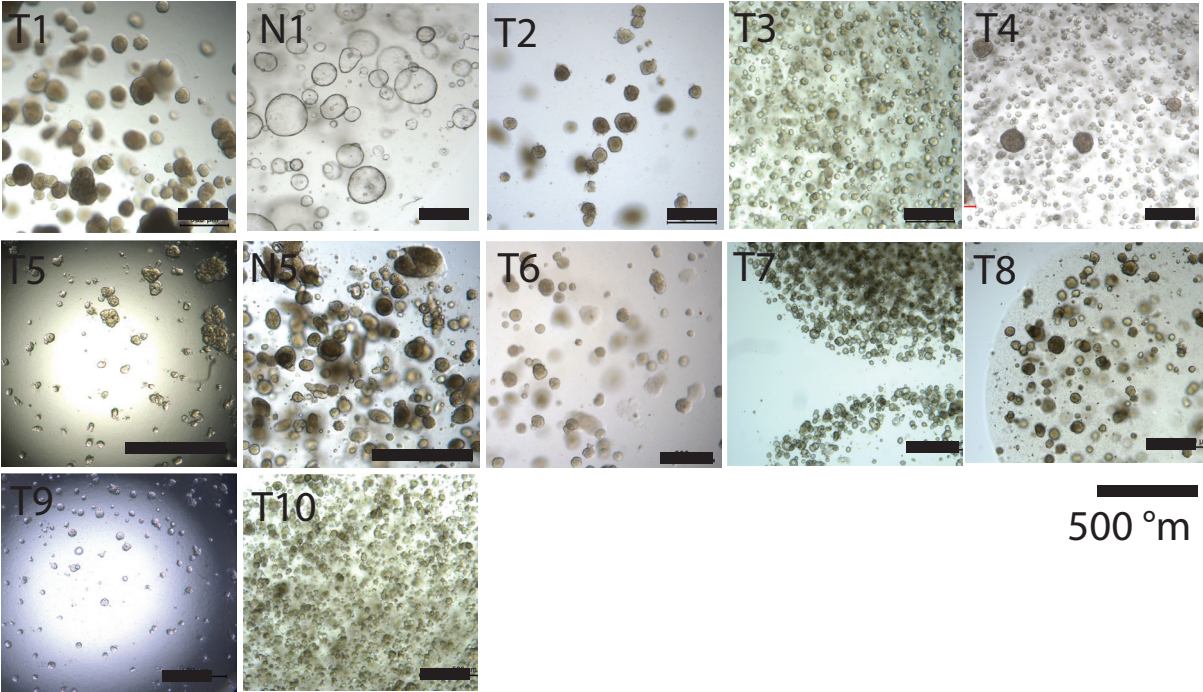

**Figure S4. Brightfield images of HNSCC-derived organoid lines, related to Figure 2.** For all organoid lines characterized in this work, images are shown of organoids in culture. Scalebar, 500 μm.

Figure S5. H&E staining of HNSCC-derived organoids reveals differences in morphology between different organoid lines.

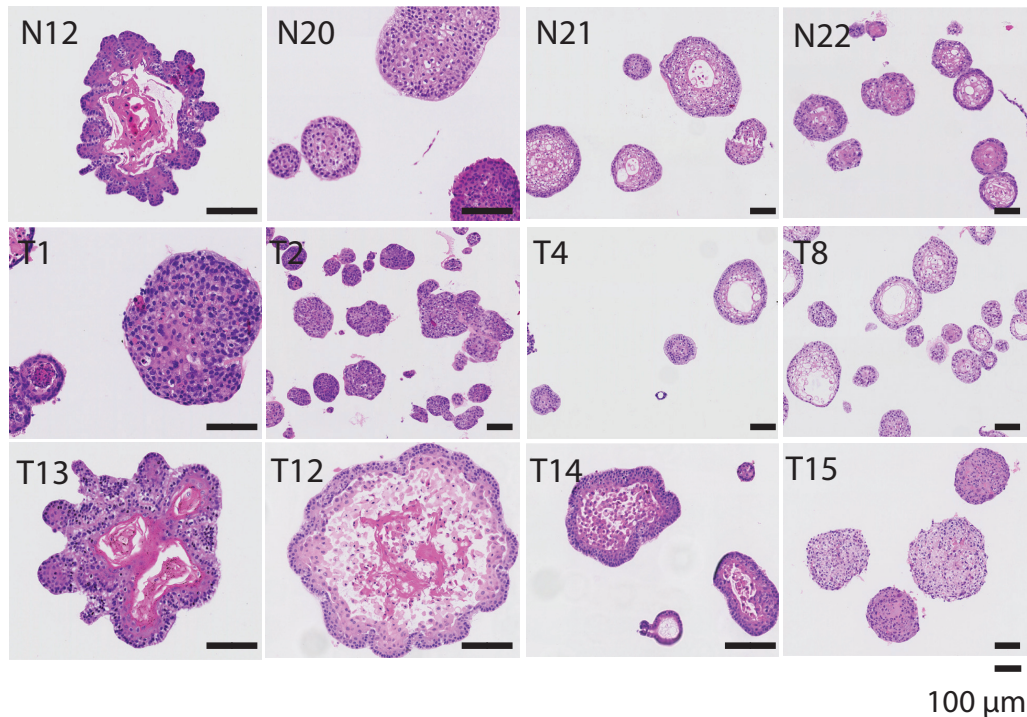

**Figure S5. H&E staining of HNSCC-derived organoids reveals differences in morphology between different organoid lines, related to Figure 2.** H&E staining performed on sections of paraffin-embedded organoids. Here, H&E staining of four normal and eight tumor lines are shown. Scalebar 100 µm.

Figure S6. Normal and tumor organoids derived from the same patient show different morphology.

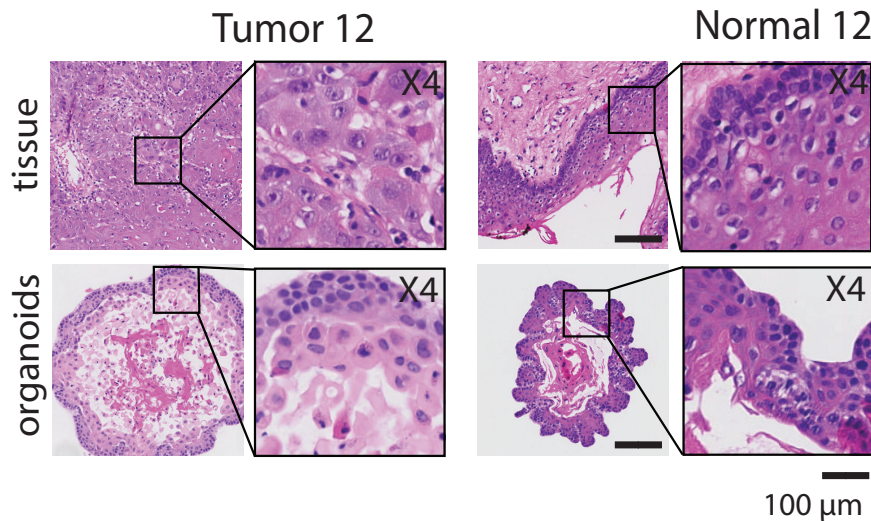

**Figure S6. Normal and tumor organoids derived from the same patient show different morphology, related to Figure 2.** Organoids were derived from both tumor tissue and adjacent normal tissue from the same patient. H&E staining of organoids are shown and reveal different morphology of the two organoid lines. Scalebar 100 μm.

Figure S7. HNSCC-derived organoid show differences in sensitivity to Nutlin-3.

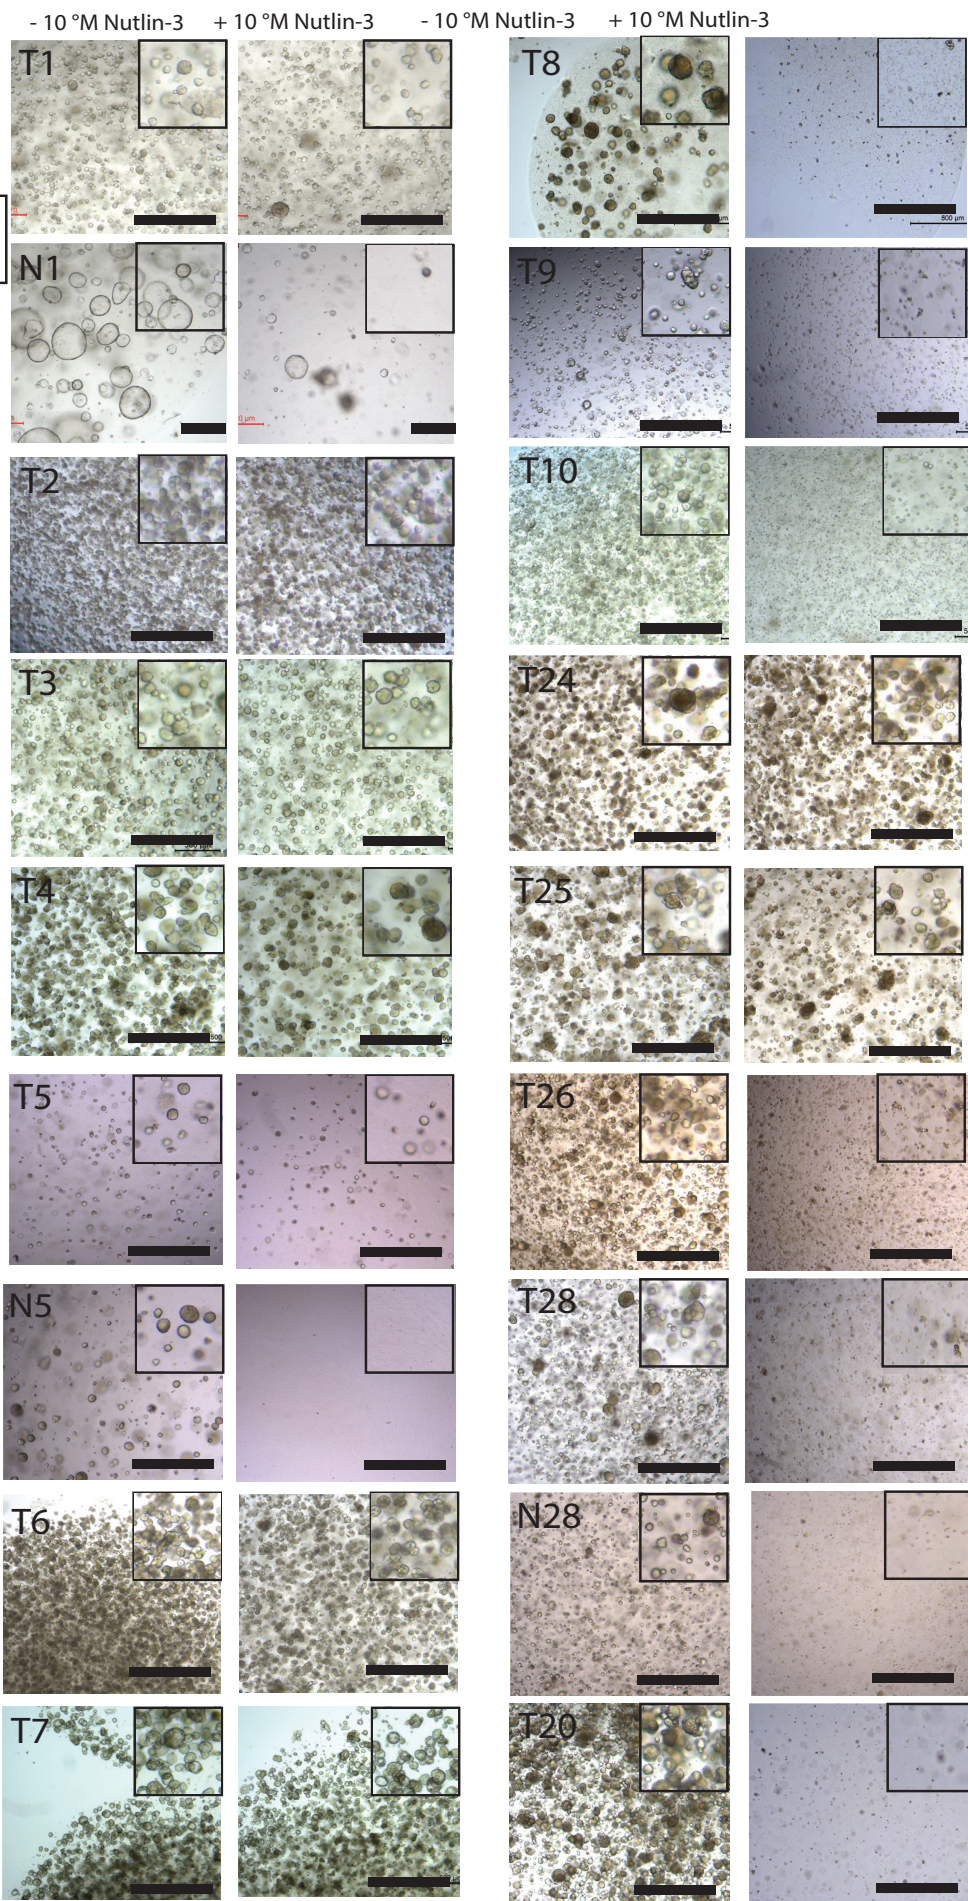

**Figure S7. HNSCC-derived organoid show differences in sensitivity to Nutlin-3, related to Figure 2.** Organoids were cultured for three passages in the presence of 10 μM Nutlin-3 and passaged weekly. Left panels, organoid cultured in the absence of Nutlin-3. Right panels, organoids cultured in the presence of Nutlin-3. All tumor lines, except T8, T9, T10, T20, T26 and T28 are resistant to these compounds. Both normal lines (N1 and N5, corresponding normal organoids of T1 and T5) show Nutlin-3 sensitivity. Scalebar. 500 μm.

Figure S8. Highlighted genes that are differentially expressed between normal and tumor organoids.

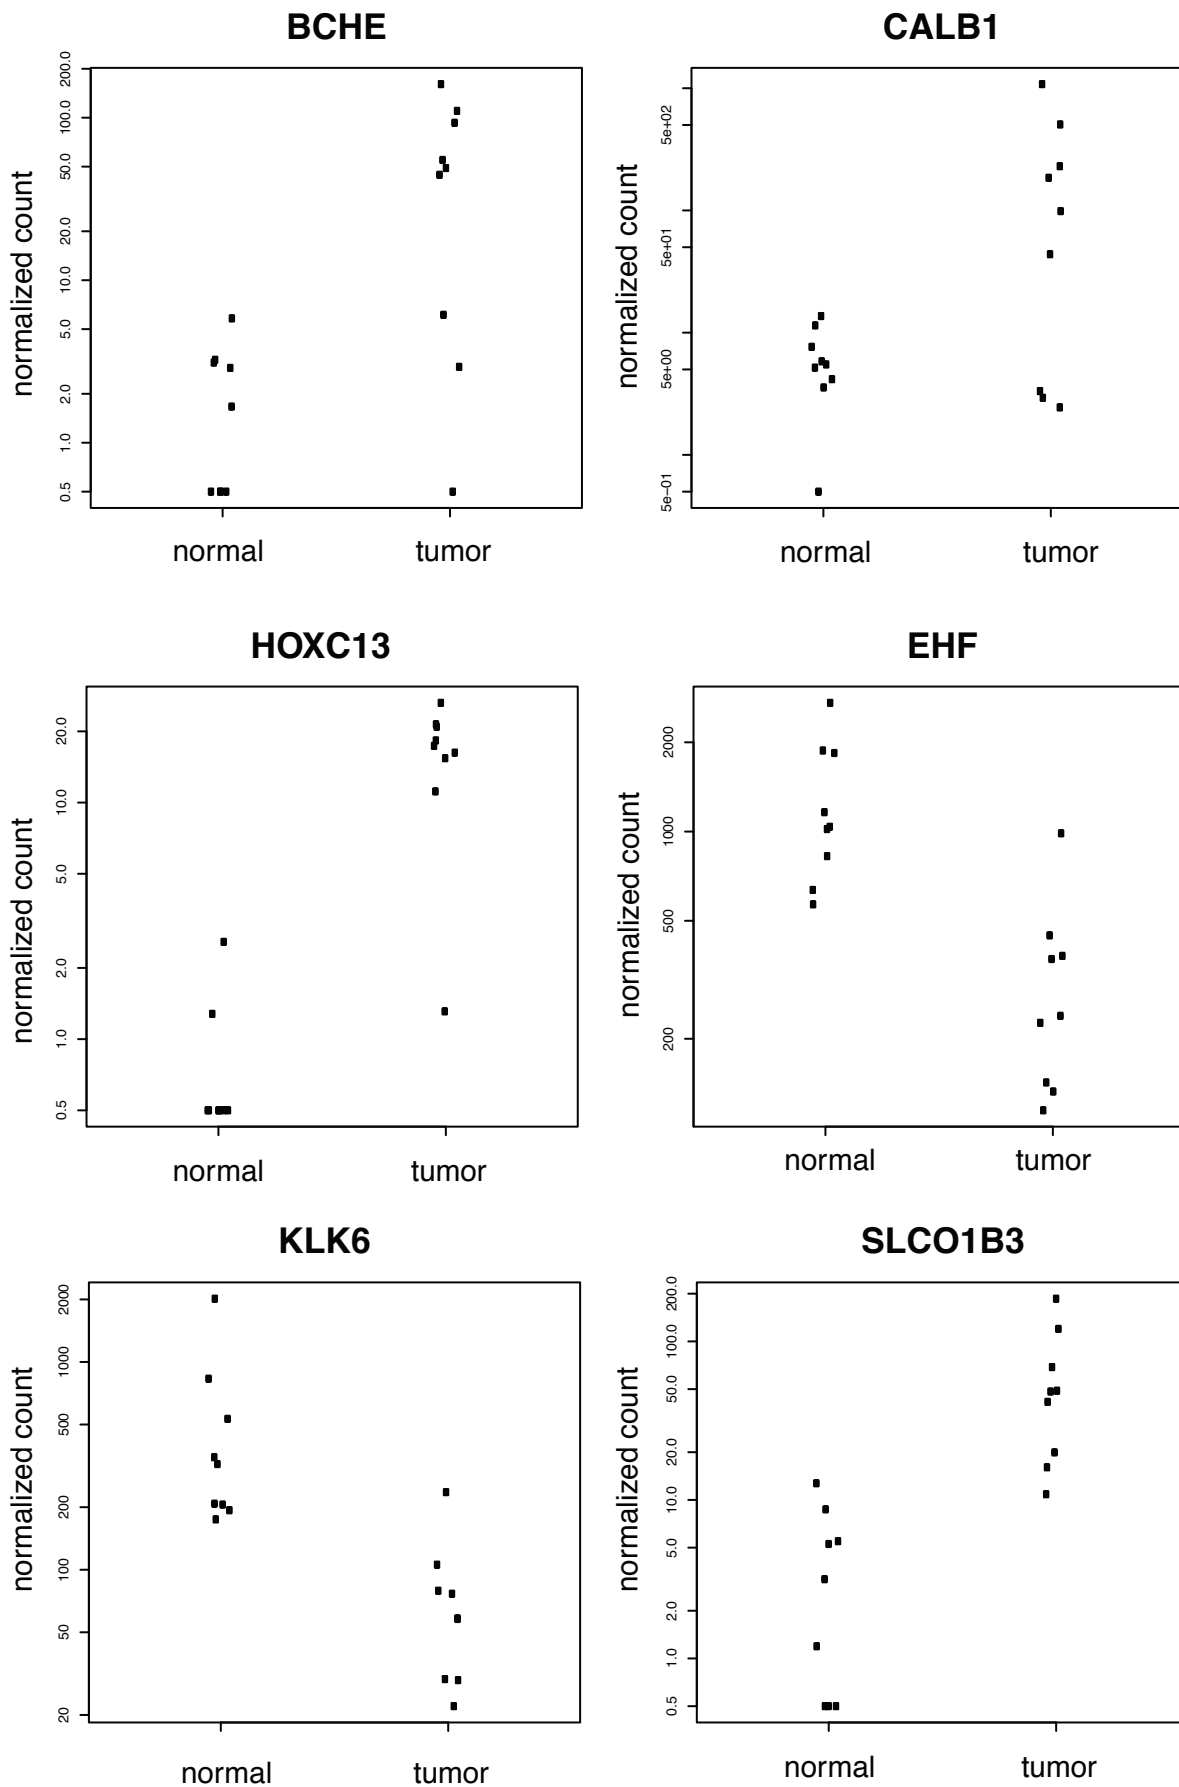

Figure S8. Highlighted genes that are differentially expressed between normal and tumor organoids, related to Figure 2. Scatterplots of the expression of these six genes, plotted for each individual gene.



# Figure S9. Comparison of sequencing results of primary tissue and organoid cultures of patient 3, 5 and 8.

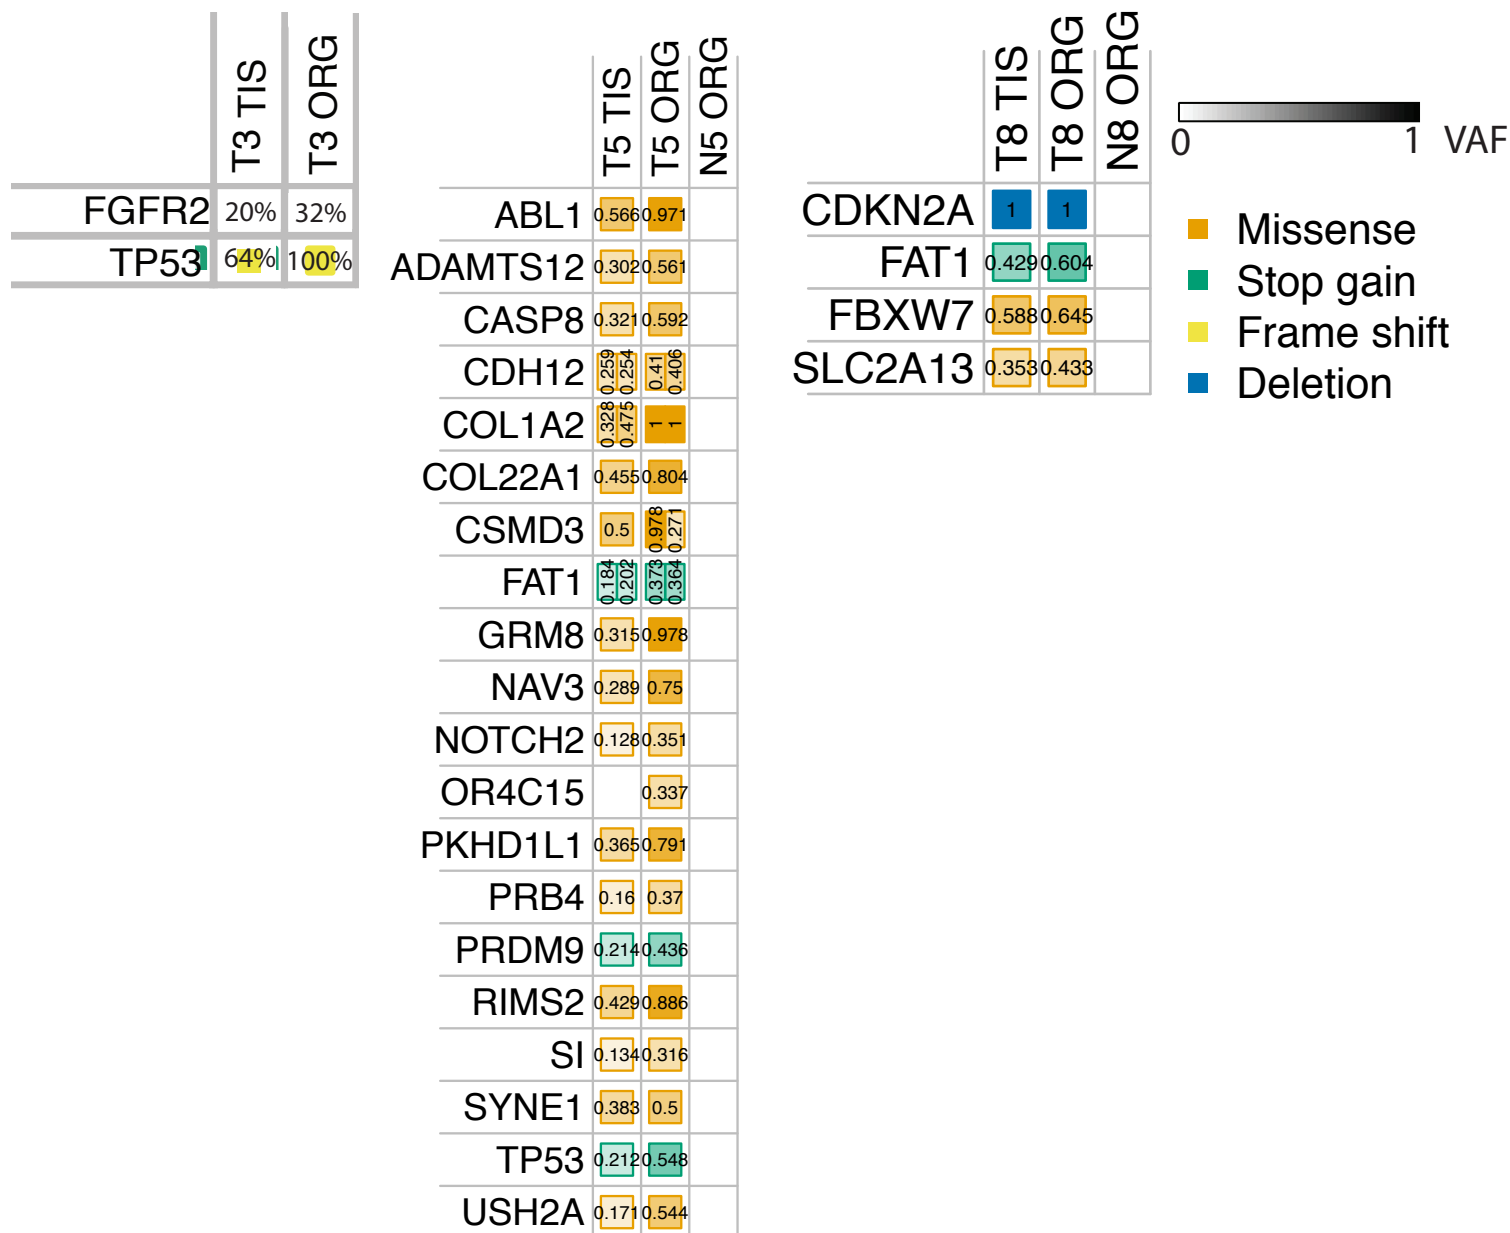

Figure S9. Comparison of sequencing results of primary tissue and organoid cultures of patient 3, 5 and 8, related to Figure 3.

Allele frequency of mutations detected by targeted sequencing (T3) or whole exome sequencing (T5 and T8), performed in both primary tissue and corresponding organoids.

Figure S10. HNSCC-derived organoids result in tumor formation in vivo.

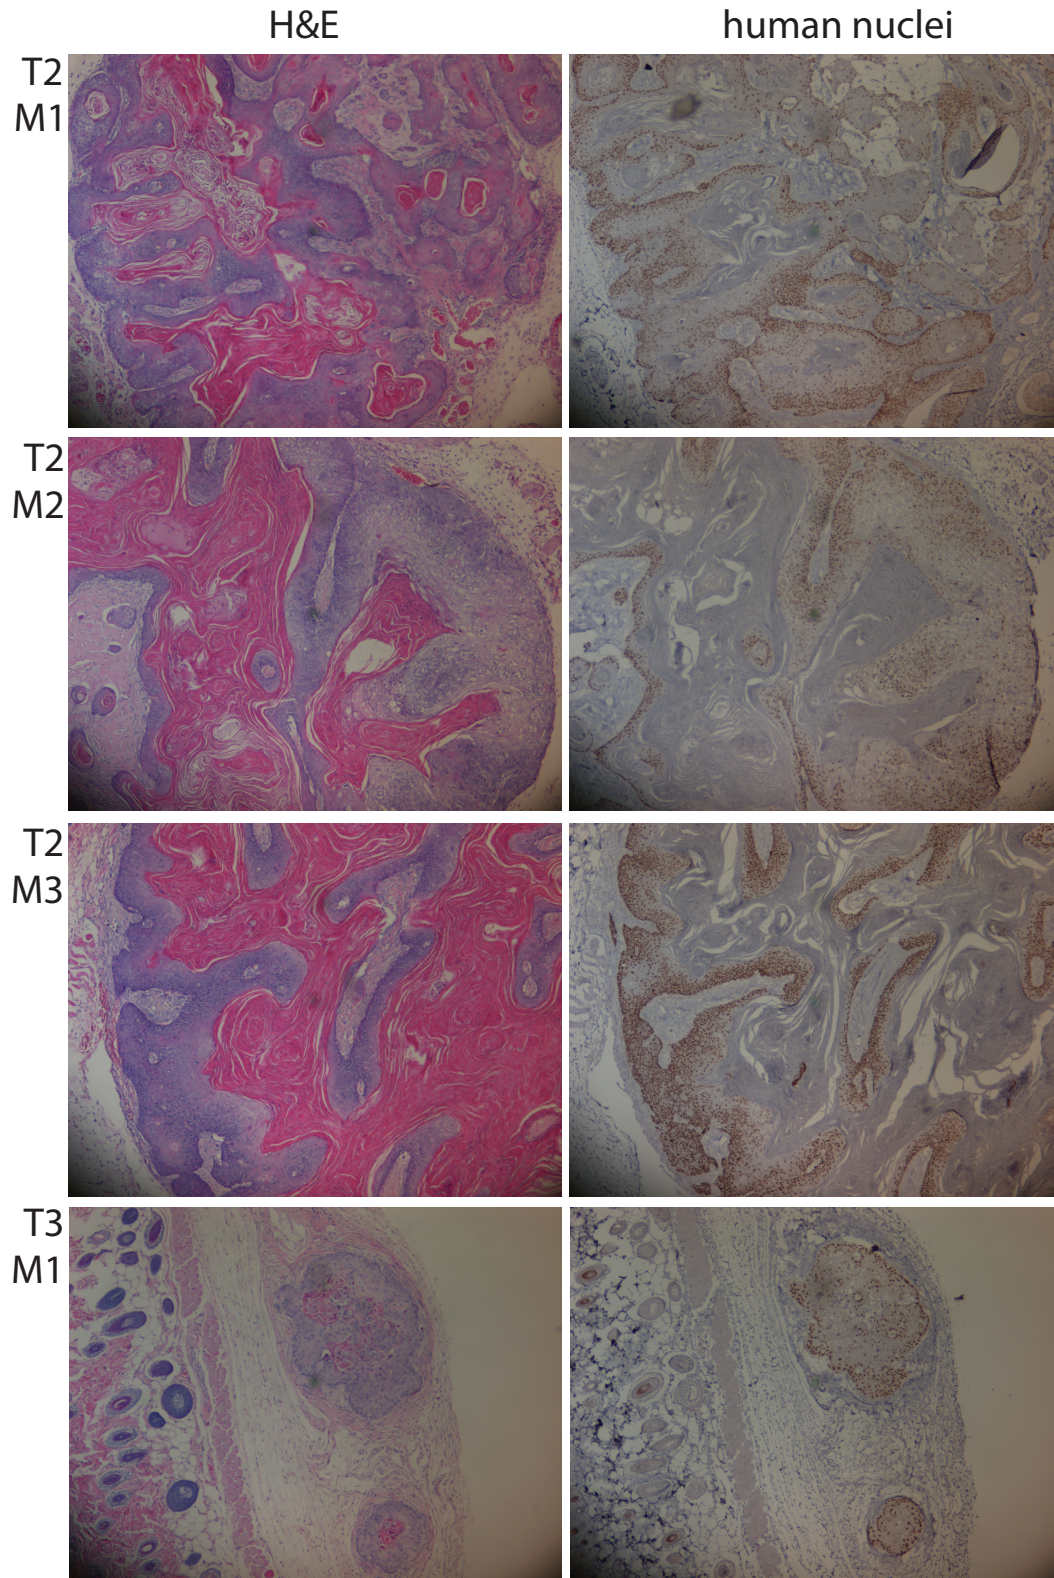

# Figure S10. HNSCC-derived organoids result in tumor formation in vivo.

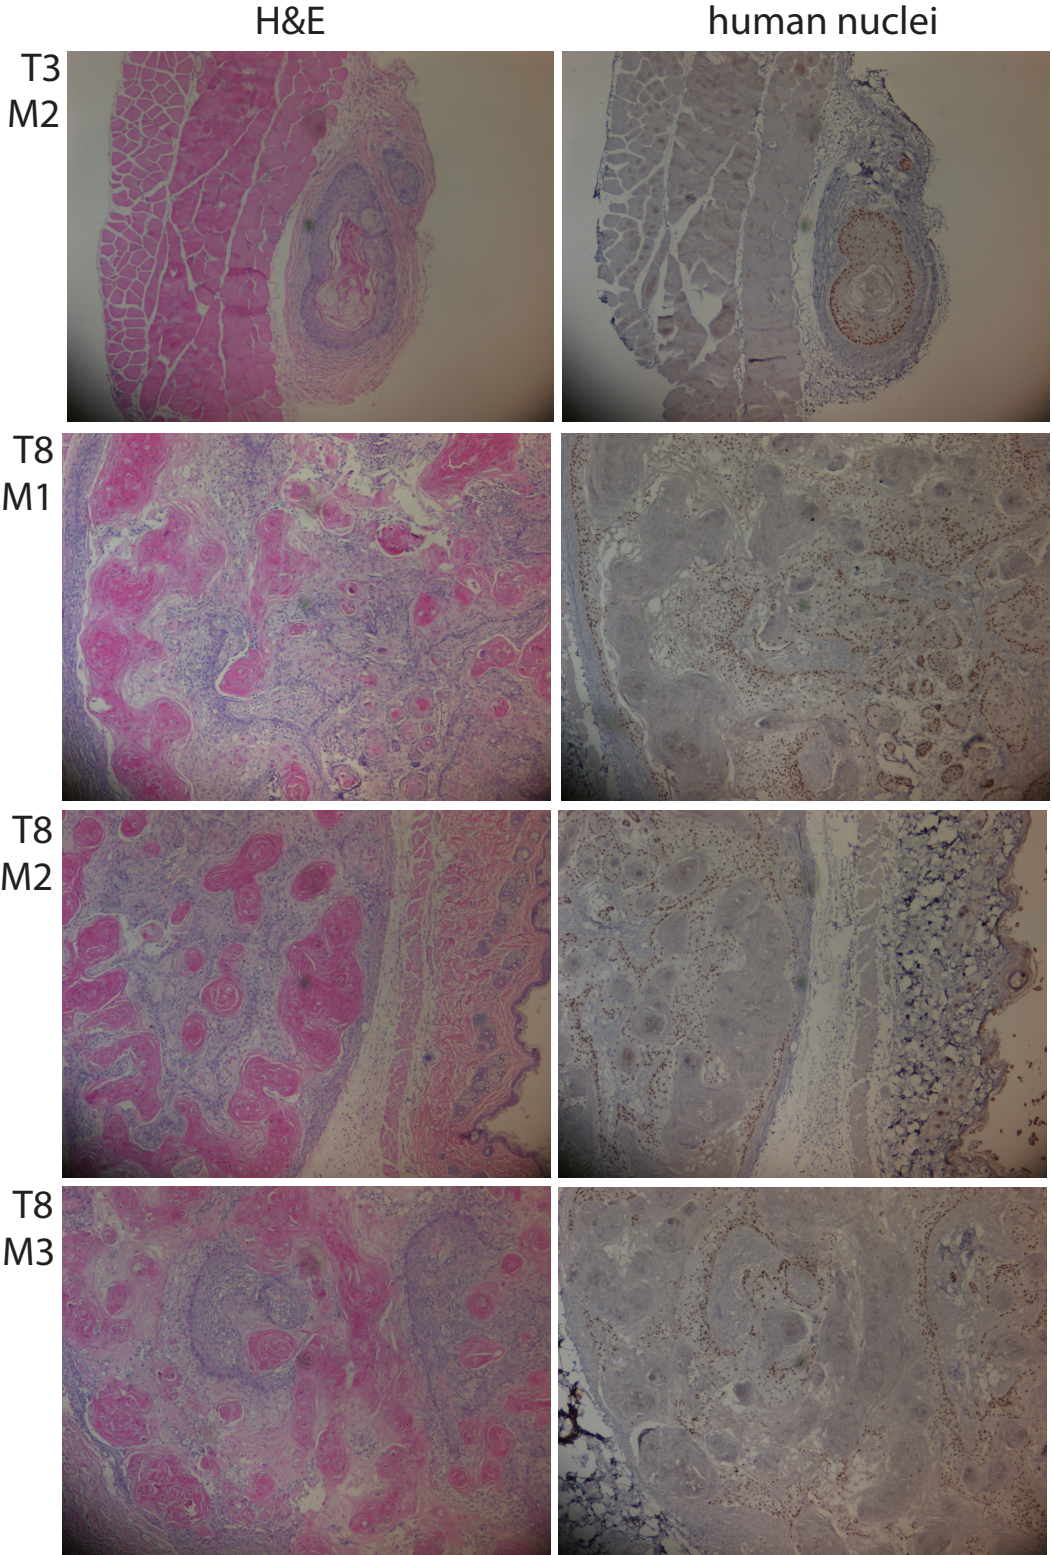

**Figure S10. HNSCC-derived organoids result in tumor formation in vivo, related to Figure 5.** For all transplanted organoid line, three mice were injected. Here, H&E and anti-human nuclei staining for these tumors is shown. As can be seen, histology of tumors originating from the same organoid line matches. Scale bar, 100  $\mu$ m.

Figure S11. In vitro drug screens in HNSCC-derived organoids.

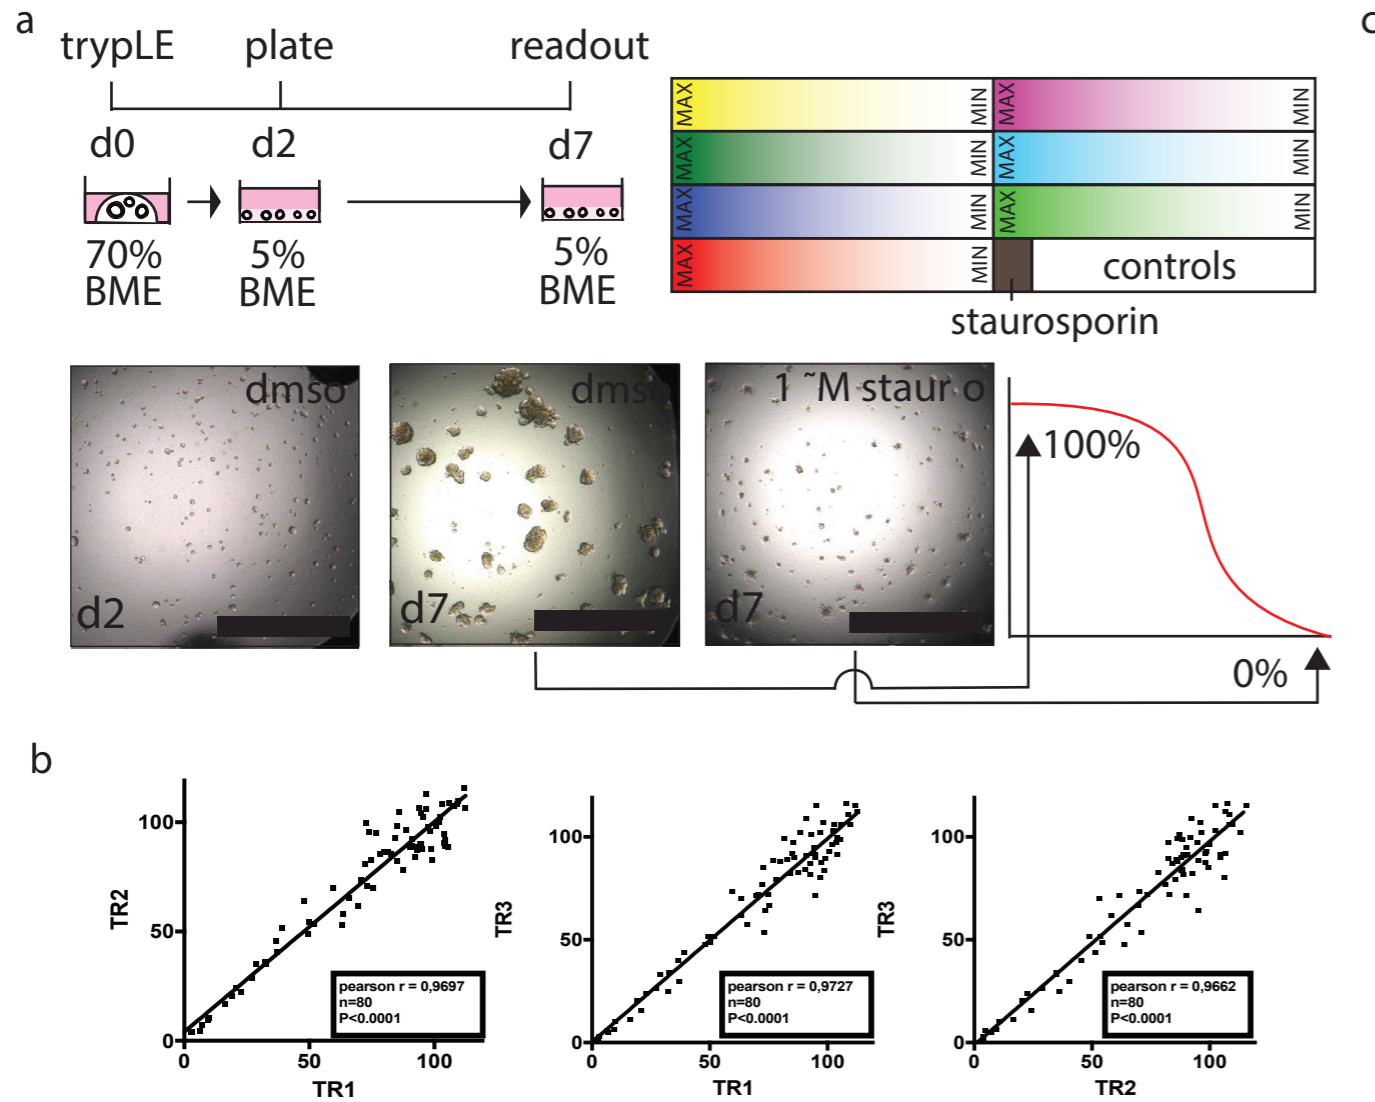

**c**

| Drug used:  | T1   | T2   | T3   | T4   | T5   | T6   | T7   | T8   | T9   | T24  | T25  | T27  | T28  |
|-------------|------|------|------|------|------|------|------|------|------|------|------|------|------|
| Cisplatin   | 0.72 | 0.72 | 0.34 | 0.77 | 0.71 | 0.65 | 0.71 | 0.92 | 0.79 | 0.82 | 0.64 | 0.60 | 0.57 |
| Carboplatin | 0.72 | 0.67 | 0.34 | 0.77 | 0.71 | 0.65 | 0.71 | 0.92 | 0.79 | 0.82 | 0.64 | 0.60 | 0.57 |
| Cetuximab   | 0.82 | 0.82 | 0.63 | 0.74 | 0.90 | 0.72 | 0.76 | 0.47 | 0.59 |      |      |      |      |
| Alpelisib   | 0.67 | 0.41 | 0.32 | 0.71 | 0.60 | 0.62 | 0.81 | 0.88 | 0.46 | 0.96 | 0.81 | 0.50 | 0.70 |
| AZD4547     | 0.76 | 0.41 | 0.85 | 0.71 | 0.60 | 0.78 | 0.81 | 0.88 | 0.46 | 0.96 | 0.81 | 0.50 | 0.70 |
| Everolimus  | 0.76 | 0.41 | 0.30 | 0.71 | 0.70 | 0.78 | 0.81 | 0.88 | 0.77 | 0.96 | 0.81 | 0.50 | 0.70 |
| Nutlin      | 0.76 | 0.41 | 0.85 | 0.71 | 0.60 | 0.78 | 0.81 | 0.88 | 0.77 | 0.96 | 0.81 | 0.50 | 0.70 |
| Niraparib   | 0.76 | 0.62 | 0.85 | 0.71 | 0.60 | 0.78 | 0.81 | 0.88 | 0.46 | 0.96 | 0.81 | 0.50 | 0.70 |
| Vemurafenib |      |      |      | 0.74 | 0.43 |      |      | 0.59 | 0.86 |      |      |      |      |

**Figure S11. In vitro drug screens in HNSCC-derived organoids, related to Figure 6.** A. Schematic layout of the drug screens as performed in this study. Organoids were disrupted into single cells on day 0, and plated to recover for two days. On day 2, organoids were collected from the BME, washed, filtered, counted and plated in 5% BME in organoid medium in 384 well format (500 organoids per well). Subsequently a gradient of drug concentrations was printed in the wells (different drugs are represented by different colors in the figure), and cells were left exposed to the drugs for five days. As positive control, cells were exposed to 1  $\mu$ M staurosporin. Solvent volumes were normalized for each plate, so that percentage DMSO or PBS/Tween-20 was identical for each well. Wells with only normalization were used as negative control. Each drug concentration was tested in triplicate. Readout was performed using Cell Titer Glow. B. To assess the reproducibility of the assay, the same drug screen was performed three times (technical replicates, named as TR1, TR2 and TR3). Calculated viability for each individual data point was plotted against its replicate value to assess robustness of the assay. C. Z factor scores of the performed drug screens for all drugs and all organoid lines presented in this work.

Figure S12. Sensitivity of HNSCC-derived organoids exposed to compounds used in this study.

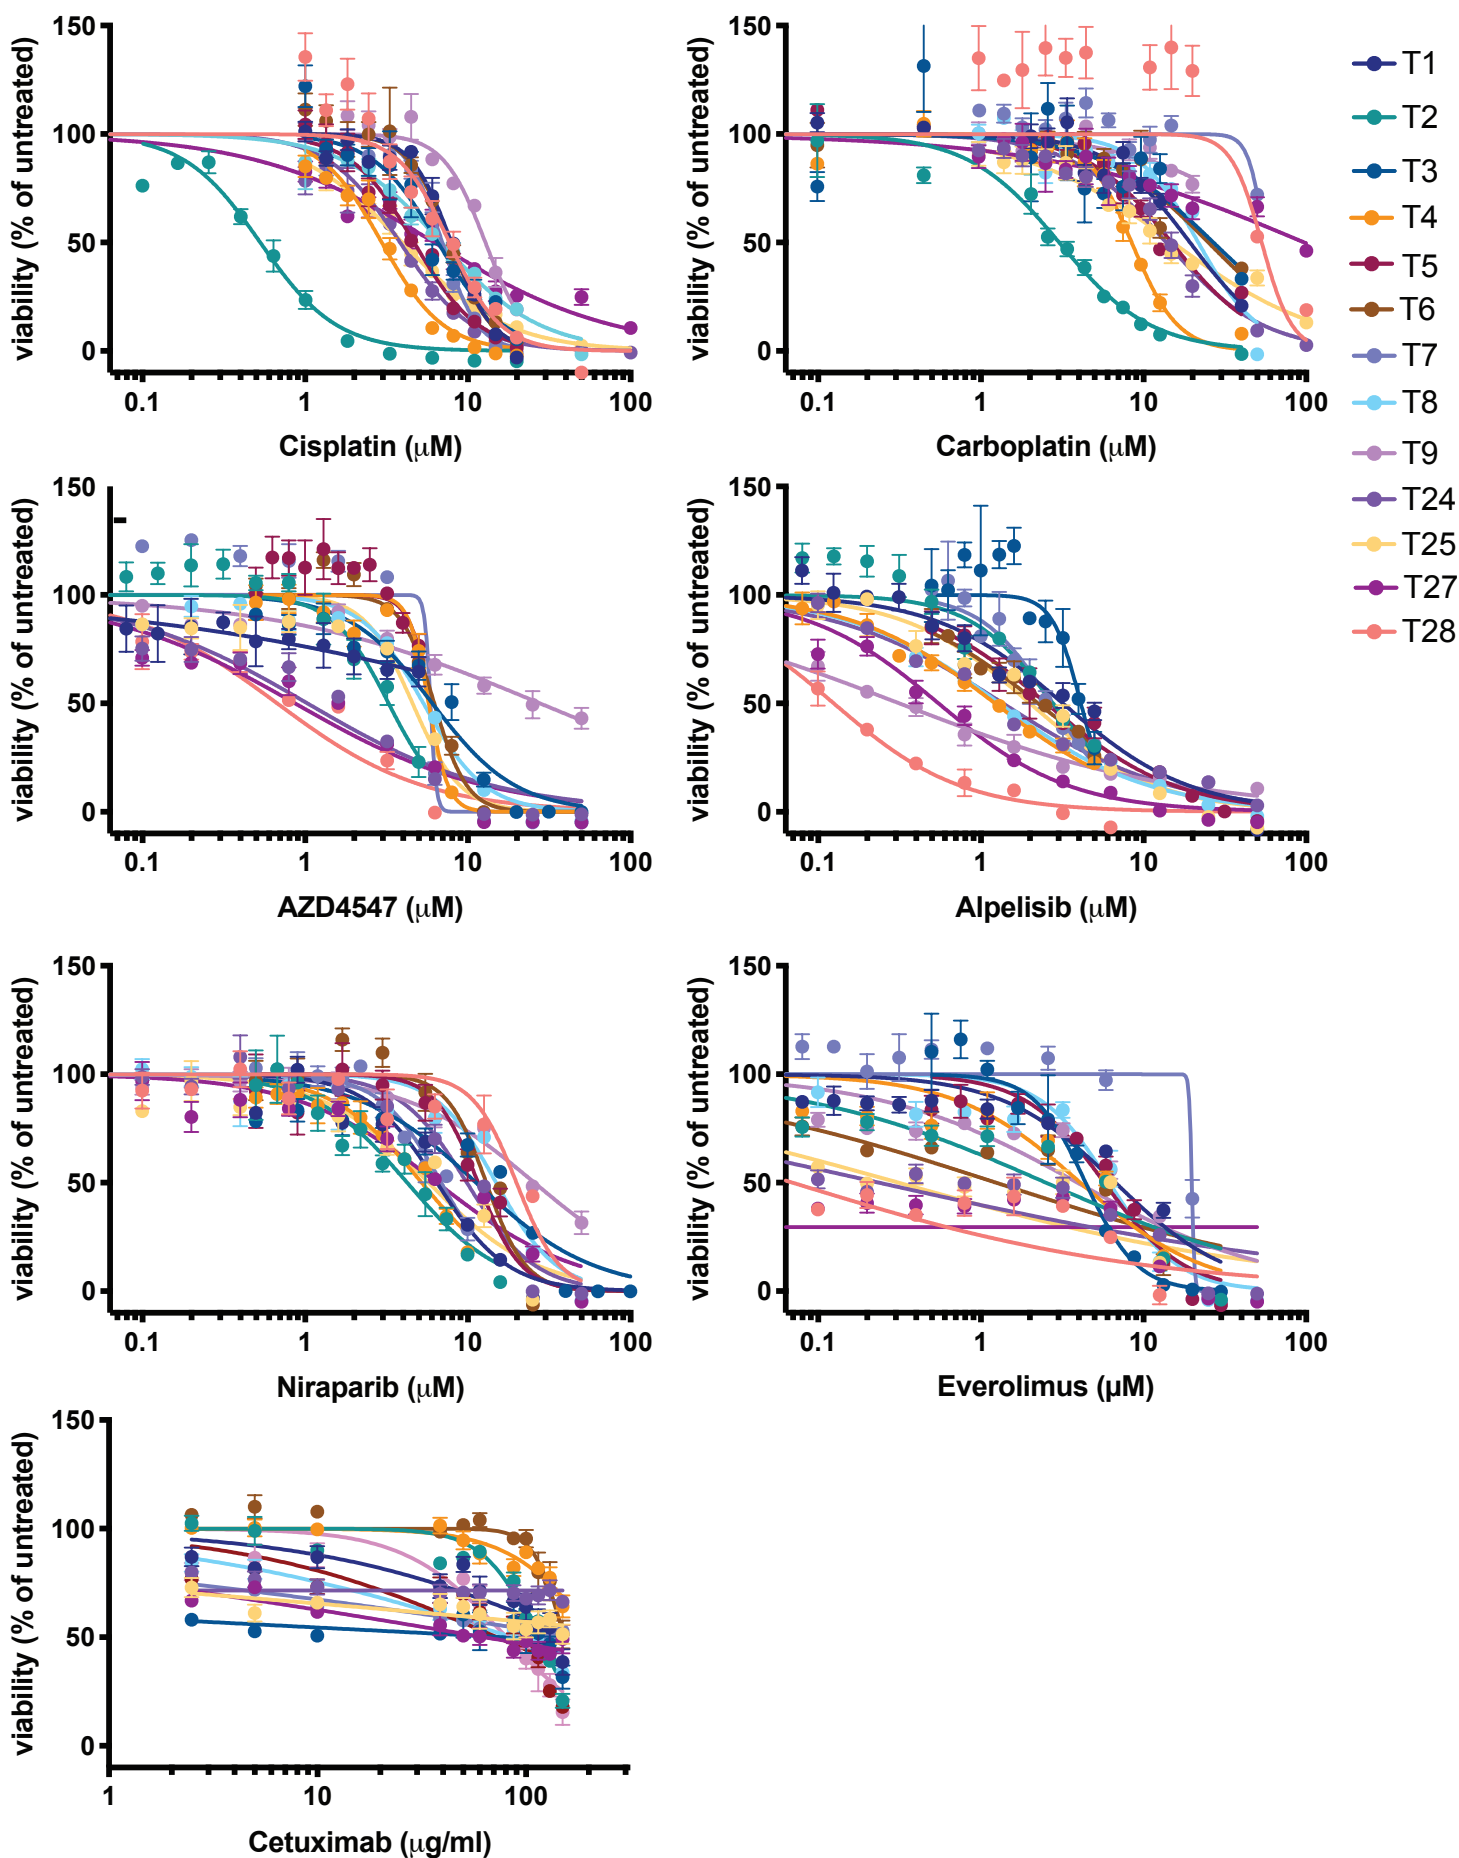

Figure S12. Sensitivity of HNSCC-derived organoids exposed to all compounds used in this study, related to Figure 6. Drugscreen results from organoid lines exposed to Cisplatin, Carboplatin, Cetuximab, AZD4547, Everolimus, Alpelisib and Niraparib.

Figure S13. Differential gene expression between organoids showing a good or poor response to cisplatin/carboplatin, cetuximab or radiotherapy.

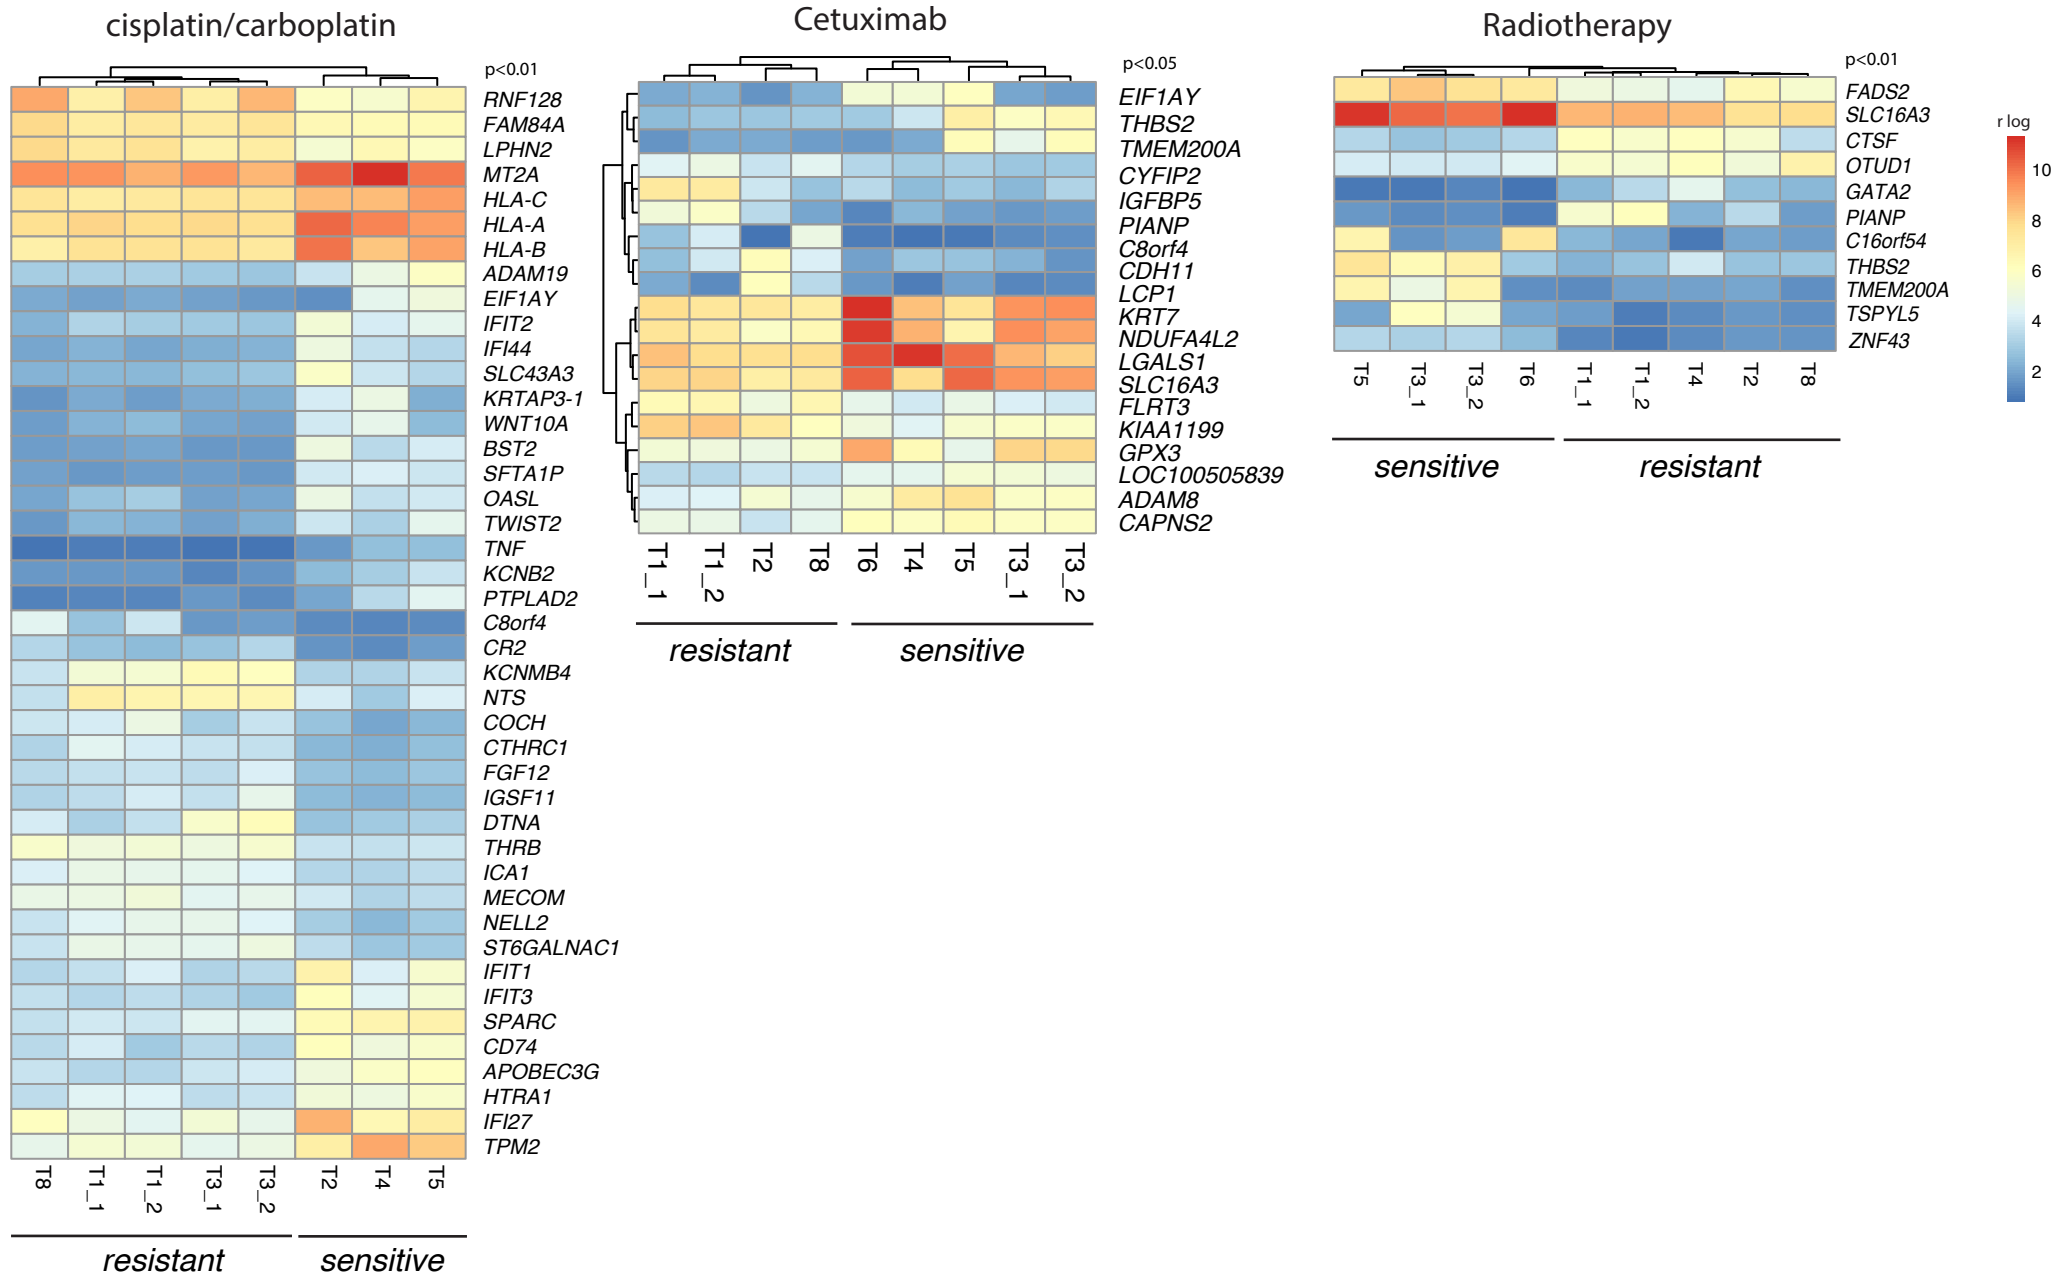

**Figure S13. Differential gene expression between organoids showing a good or poor responses to cisplatin/carboplatin, cetuximab or radiotherapy, related to figure 6. .** Heatmap showing differentially expressed genes between good and bad responding organoid lines. Only genes with a  $p_{adj} < 0.001$  are shown here. DEseq analysis results in identification of genes differentially expressed between lines that are most and least sensitive, respectively, to the therapy of interest. Here, cisplatin/carboplatin, cetuximab and radiotherapy are tested.

Figure S14. Chemoradiation therapy in ten HNSCC organoid lines, related to Figure 6.

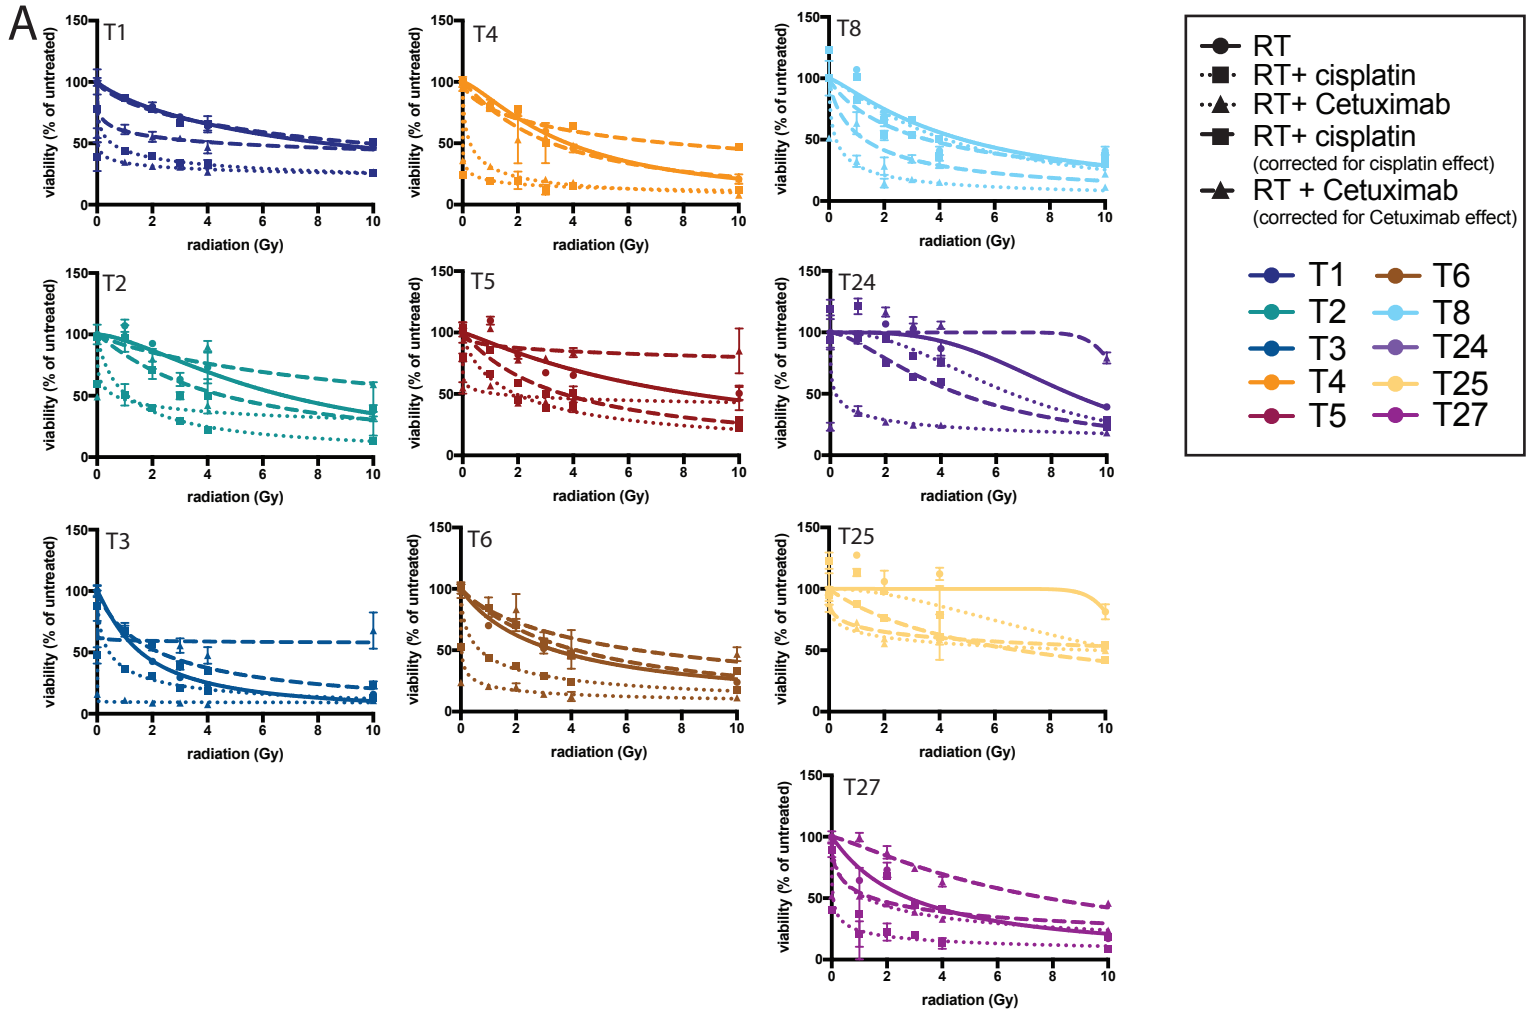

**B**

|                                     | T3    | T24   | T6    | T4    | T8    | T1    | T2    | T5    | T27   | T25   |
|-------------------------------------|-------|-------|-------|-------|-------|-------|-------|-------|-------|-------|
| RT only AUC                         | 316.4 | 428   | 477.7 | 489.2 | 557.9 | 651.3 | 682.7 | 688.4 | 835.6 | 1029  |
| RT in the presence or cisplatin AUC | 401.4 | 394.3 | 523.4 | 622.8 | 506.1 | 654.6 | 557.9 | 511.7 | 560.1 | 617.6 |

low high

**C**

|                                     | T3    | T24   | T6    | T4    | T8    | T1    | T2    | T5    | T27   | T25   |
|-------------------------------------|-------|-------|-------|-------|-------|-------|-------|-------|-------|-------|
| RT only AUC                         | 316.4 | 428   | 477.7 | 489.2 | 557.9 | 651.3 | 682.7 | 688.4 | 835.6 | 1029  |
| RT in the presence or Cetuximab AUC | 600.4 | 670.9 | 594   | 471.7 | 347.2 | 526   | 787.9 | 858.2 | 1035  | 619.9 |

low high

**D**

|                | T24   | T3    | T8    | T5    | T6    | T2    | T27   | T25   | T4    | T1    |
|----------------|-------|-------|-------|-------|-------|-------|-------|-------|-------|-------|
| RT + Cis AUC   | 394.3 | 401.4 | 506.1 | 511.7 | 523.4 | 557.9 | 560.1 | 617.6 | 622.8 | 654.6 |
| RT AUC         | 428   | 316.4 | 557.9 | 688.4 | 477.7 | 682.7 | 835.6 | 1029  | 489.2 | 651.3 |
| Cisplatin IC50 | 3.8   | 6.6   | 6.9   | 6.9   | 7.8   | 0.5   | 6.2   | 4.0   | 3.0   | 7.9   |

low high

**E**

|               | T8    | T4    | T1    | T6    | T3    | T25   | T24   | T2    | T5    | T27   |
|---------------|-------|-------|-------|-------|-------|-------|-------|-------|-------|-------|
| RT+ Cet AUC   | 347.2 | 471.7 | 526   | 594   | 600.4 | 619.9 | 670.9 | 787.9 | 858.2 | 1035  |
| RT AUC        | 557.9 | 489.2 | 651.3 | 477.7 | 316.4 | 1029  | 428   | 682.7 | 688.4 | 835.6 |
| Cetuximab AUC | 119.4 | 170.5 | 137.5 | 180.7 | 93.64 | 112.6 | 129.5 | 152   | 121.4 | 104.1 |

low high

**Figure S14. Chemoradiation therapy in ten HNSCC organoid lines, related to Figure 6.** A. Kill curves of all ten tested lines, exposed to radiotherapy (RT) alone, or in combination with cisplatin or Cetuximab. B, Heatmap depicting AUC of RT alone or combined with cisplatin, corrected for the effect of chemotherapy alone. C. Heatmap depicting AUC of RT alone, or combined with Cetuximab, corrected for the effect of chemotherapy alone. D. Heatmap depicting AUC of RT alone, cisplatin alone, or RT + Cisplatin, not corrected for the effect of chemotherapy alone. E. Heatmap depicting AUC of RT alone, Cetuximab alone, or RT + Cetuximab, not corrected for the effect of chemotherapy alone. Blue indicates low AUC values, red indicates high AUC values.

Figure S15. Sensitivity of matched normal and tumor organoids to compounds used in this study.

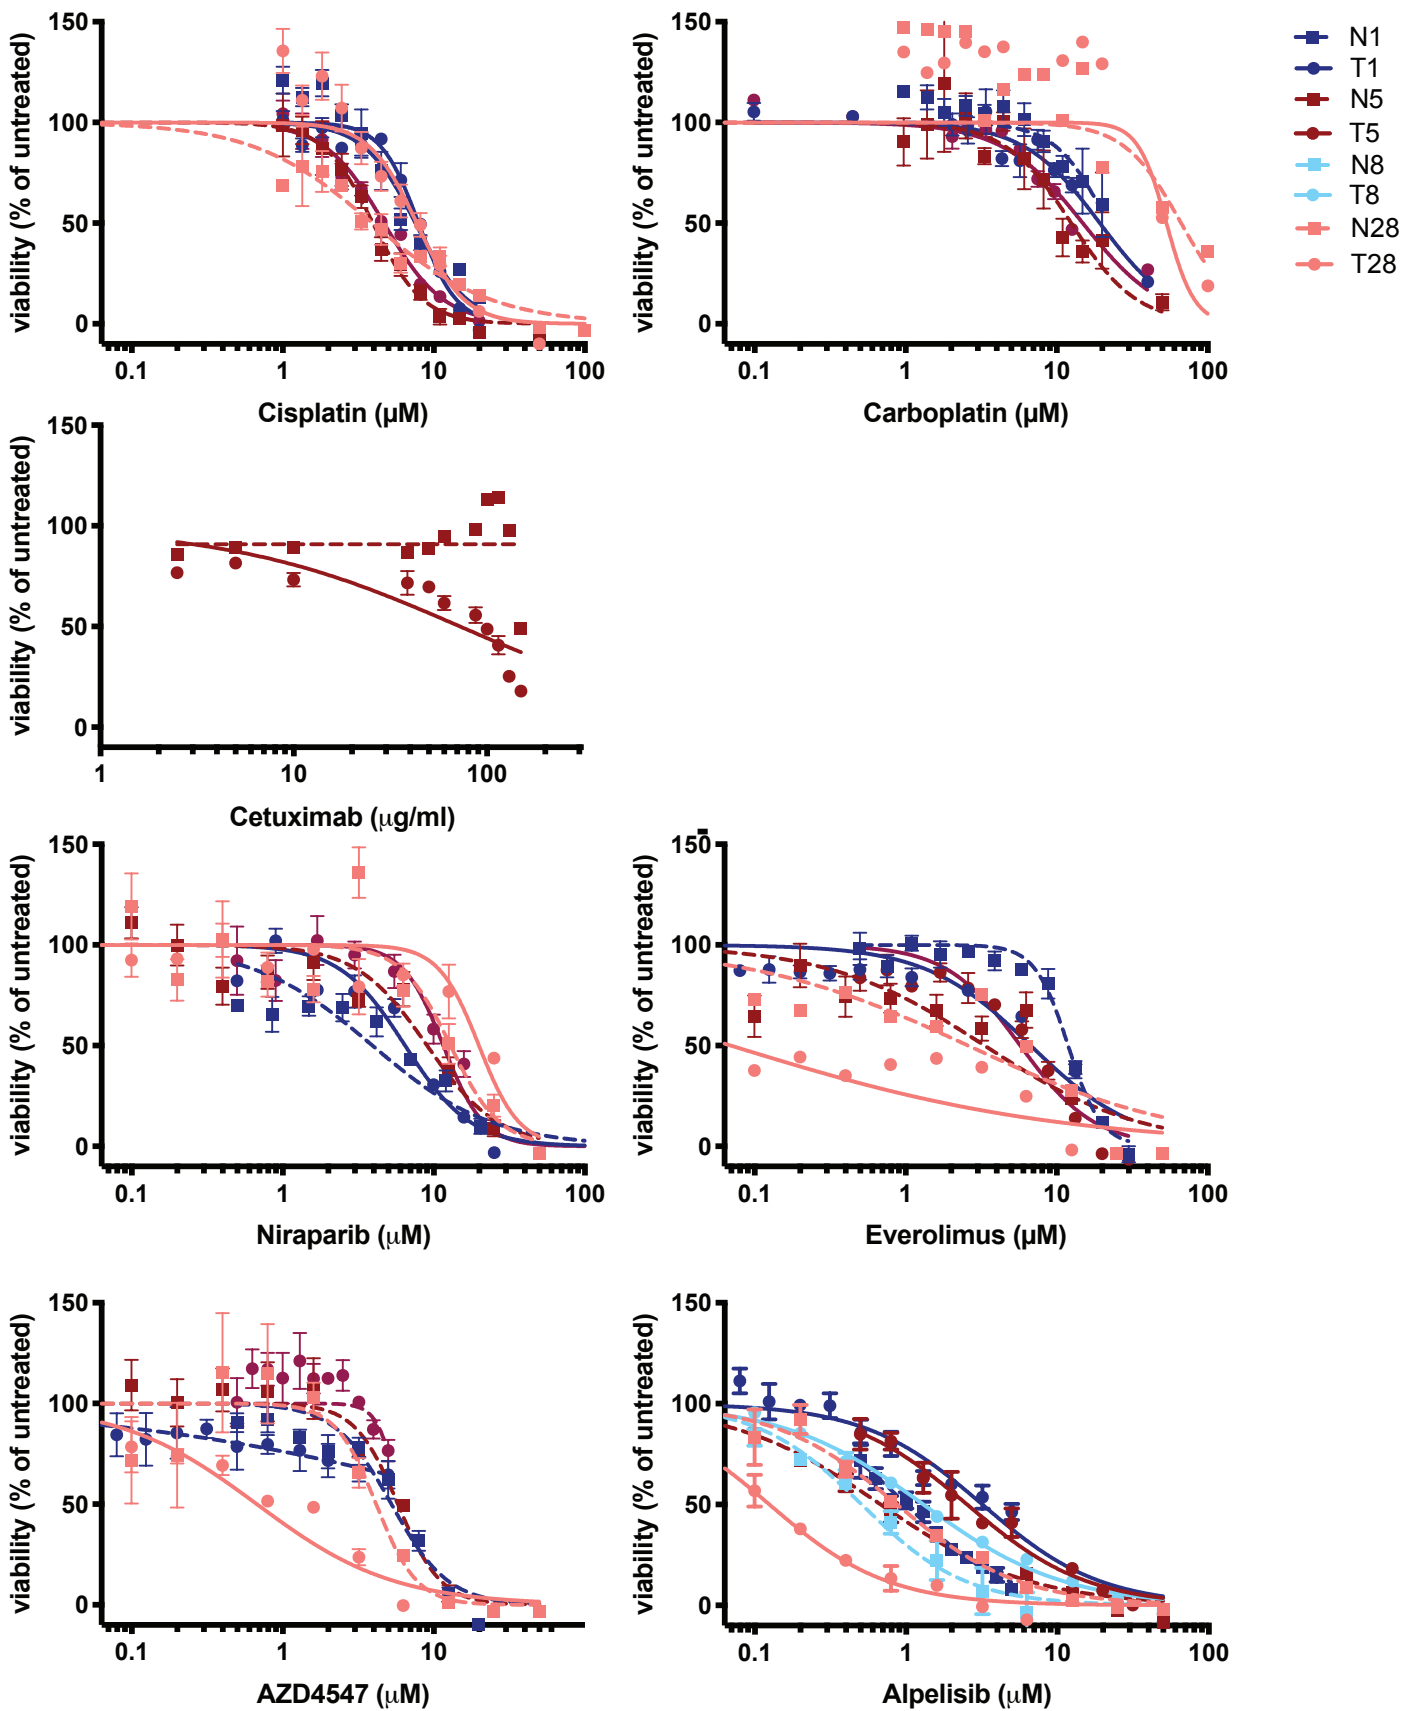

**Figure S15. Sensitivity of matched normal and tumor organoids to compounds used in this study, related to Figure 7.** Drugscreen results from N1 and T1, N5 and T5, N8 and T8 and N28 and T28 organoid lines exposed to cisplatin, carboplatin, cetuximab, Niraparib, Everolimus, AZD4547 and Alpelisib.



Figure S16. Organoid in vitro drug response, remains comparable over time in culture.

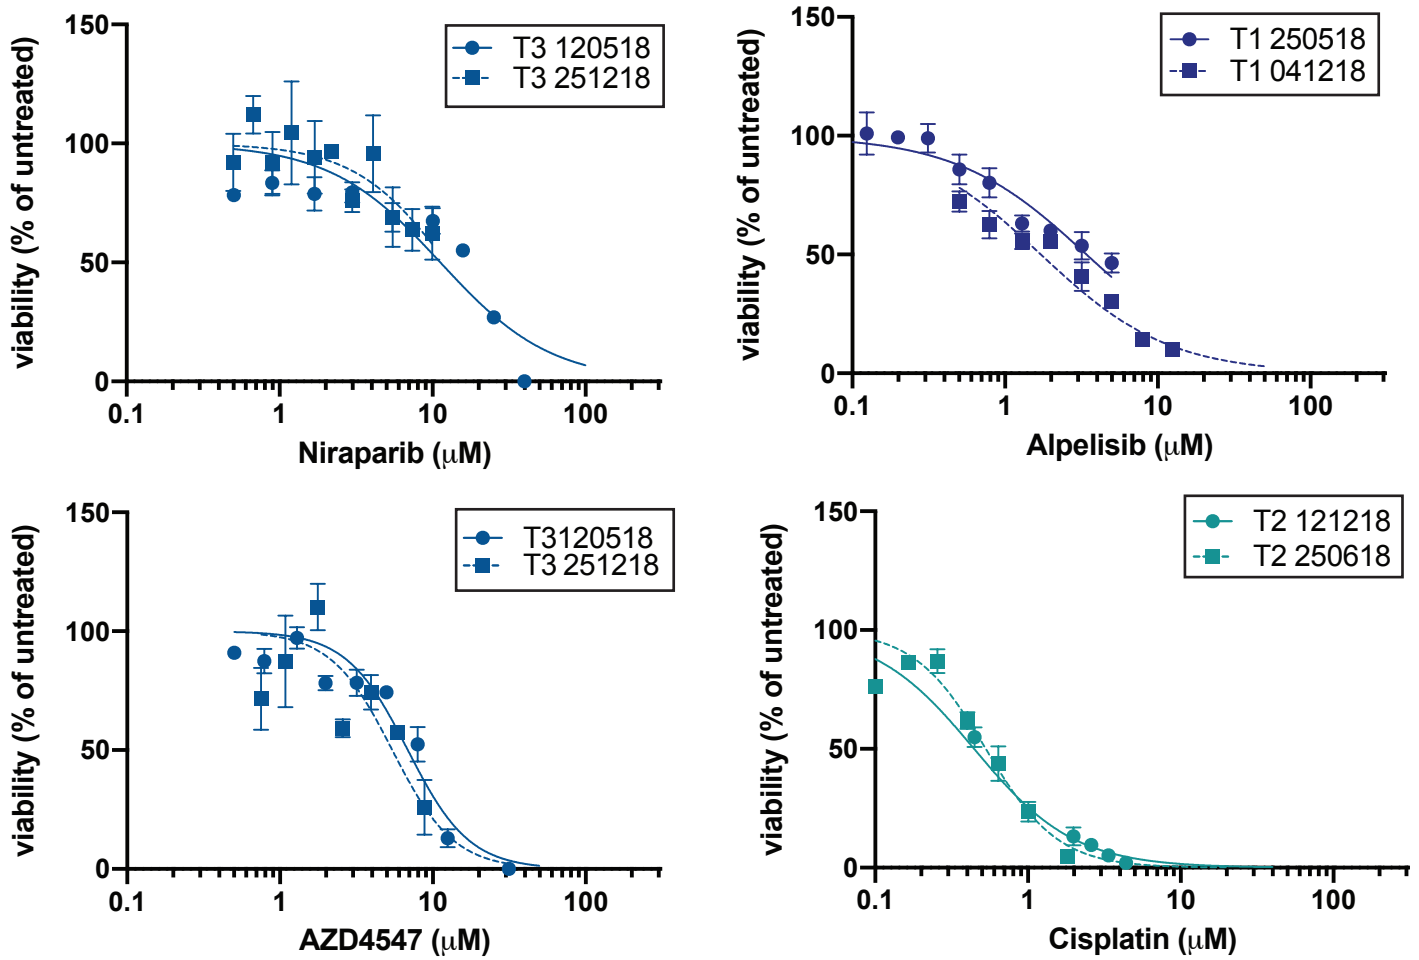

**Figure S16. Organoid in vitro drug response remains comparable over time in culture, related to Figure 6 and 7.** Four different drug screens were performed with at least 22 weeks of culturing in between, and reveal comparable drug screening results over time. Screens shown are Alpelisib testing in T1, Cisplatin testing in T2 and Niraparib and AZD4547 testing in T3.

**Table S1. Patient clinical data, related to Figure 2A**

| #T | gender | birthyear | tumor location     | pretreatment | HPV status | sequencing       | drugscreen | N/T | No longer in culture |
|----|--------|-----------|--------------------|--------------|------------|------------------|------------|-----|----------------------|
| 1  | male   | 1955      | tongue             | no           | negative   | oncopanel        | Yes        | N/T |                      |
| 2  | female | 1927      | larynx             | no           | negative   | oncopanel        | Yes        | T   |                      |
| 3  | female | 1934      | larynx             | no           | negative   | oncopanel        | Yes        | T   |                      |
| 4  | male   | 1956      | tongue             | no           | negative   | oncopanel        | Yes        | T   |                      |
| 5  | male   | 1938      | parotis SCC        | no           | negative   | exome sequencing | Yes        | N/T |                      |
| 6  | male   | 1935      | oral cavity        | no           | negative   | oncopanel        | Yes        | T   |                      |
| 7  | female | 1960      | floor of mouth     | no           | negative   | oncopanel        | Yes        | T   |                      |
| 8  | female | 1948      | gingiva            | no           | negative   | exome sequencing | Yes        | N/T |                      |
| 9  | male   | 1948      | mandibula          | no           | negative   | oncopanel        | Yes        | T   |                      |
| 10 | female | 1936      | mandibula          | no           | n.t.       | oncopanel        | No         | T   | stopped at p10       |
| 11 | male   | 1951      | oral cavity        | no           | n.t.       | n.t.             | No         | T   | stopped at p20       |
| 12 | male   | 1937      | gingiva            | no           | n.t.       | n.t.             | No         | T   |                      |
| 13 | male   | 1946      | larynx             | no           | n.t.       | n.t.             | No         | T   |                      |
| 14 | female | 1962      | larynx             | no           | n.t.       | n.t.             | No         | T   | stopped at p4        |
| 15 | male   | 1954      | pharynx            | no           | n.t.       | n.t.             | No         | T   |                      |
| 16 | male   | 1959      | pharynx            | no           | n.t.       | n.t.             | No         | T   |                      |
| 17 | male   | 1939      | floor of mouth     | no           | n.t.       | n.t.             | No         | N   |                      |
| 18 | male   | 1949      | larynx             | no           | n.t.       | n.t.             | No         | N   |                      |
| 19 | male   | 1949      | oropharynx         | no           | n.t.       | n.t.             | No         | T   |                      |
| 20 | male   | 1954      | salivary gland SCC | no           | n.t.       | oncopanel        | No         | N/T |                      |
| 21 | female | 1947      | larynx             | no           | n.t.       | n.t.             | No         | T   | stopped at p5        |
| 22 | male   | 73        | pharynx            | no           | negative   | n.t.             | No         | T   |                      |
| 23 | male   | 1970      | floor of mouth     | no           | n.t.       | n.t.             | No         | T   |                      |
| 24 | male   | 1941      | oral cavity        | no           | n.t.       | oncopanel        | Yes        | T   |                      |
| 25 | male   | 1946      | floor of mouth     | no           | n.t.       | oncopanel        | Yes        | T   |                      |
| 26 | male   | 1947      | nasal cavity       | no           | n.t.       | oncopanel*       | no         | T   |                      |
| 27 | female | 1958      | oral cavity        | no           | n.t.       | oncopanel        | Yes        | N/T |                      |

|    |        |      |             |    |      |           |     |     |               |
|----|--------|------|-------------|----|------|-----------|-----|-----|---------------|
| 28 | male   | 1935 | oral cavity | no | n.t. | oncopanel | Yes | N/T |               |
| 29 | male   | 1943 | neck        | no | n.t. | oncopanel | Yes | N/T |               |
| 30 | male   | 1947 | hypopharynx | no | n.t. | n.t.      | No  | T   |               |
| 31 | female | 1932 | tongue      | no | n.t. | n.t.      | No  | N   |               |
| 32 | female | 1939 | larynx      | no | n.t. | n.t.      | No  | T   |               |
| 34 | female | 1972 | larynx      | no | n.t. | n.t.      | No  | T   | stopped at p5 |
| 35 | male   | 1965 | oral cavity | no | n.t. | n.t.      | No  | N   | stopped at p6 |

- No mutations were detected by the 54 gene covering oncopanel. WGS will be performed to validate the tumor origin of this organoid line.

**Table S1. Patient clinical data, related to Figure 2A.** Patient data corresponding to the organoid lines presented in this work.

**Table S3: Detected mutations in genes checked in the OncoAMP panel, related to Figure 4.**

| organoid line | gene   | DNA     | protein      | variant effect  | external status |
|---------------|--------|---------|--------------|-----------------|-----------------|
| T1            | PIK3CA | 1633G>A | Glu545Lys    | missense        | COSM763         |
| T1            | TP53   | 586C>T  | Arg196*      | stop gained     | COSM10705       |
| T2            | KRAS   | 204G>T  | Arg68Ser     | Missense        | COSM183929      |
| T2            | ESR1   | 1138G>A | Glu380Lys    | Missense        |                 |
| T2            | TP53   | 406C>T  | Gln136*      | Stop gained     | COSM11166       |
| T2            | TP53   | 374C>T  | Thr125Met    | Missense        | COSM44988       |
| T3            | TP53   | 102delC | Leu35Cysfs*9 | Frameshift      | COSM2745164     |
| T3            | FGFR2  | 1576A>G | Lys526Glu    | Missense        | rs121918507     |
| T4            | HRAS   | 37G>C   | Gly13Arg     | Missense        | COSM486         |
| T4            | TP53   | 578A>G  | His193Arg    | Missense        | COSM10742       |
| T6            | CDKN2A | 151G>A  |              | splice acceptor | COSM13694       |
| T6            | TP53   | 637C>T  | Arg213*      | stop gained     | COSM10654       |
| T6            | TP53   | 856G>A  | Glu286Lys    | Missense        | COSM10726       |
| T7            | KRAS   | 35G>C   | Gly12Arg     | Missense        | COSM522         |
| T7            | PIK3CA | 1633G>A | Glu545Lys    | Missense        | COSM763         |
| T7            | MET    | 504G>T  | Glu168Asp    | Missense        | COSM706         |
| T7            | TP53   | 830G>A  | Cys277Tyr    | Missense        | COSM43737       |
| T9            | BRAF   | 1799T>A | Val600Glu    | Missense        | COSM476         |
| T9            | PIK3CA | 3140A>G | His1047Arg   | Missense        | COSM775         |
| T10           | BRAF   | 1799T>A | Val600Glu    | Missense        | COSM476         |
| T10           | PIK3CA | 3140A>G | His1047Arg   | Missense        | COSM775         |
| T20           | VHL    | 74C>T   | Pro25Leu     | Missense        | COSM36211       |
| T24           | KRAS   | 34G>C   | Gly12Arg     | Missense        | COSM518         |
| T24           | TP53   | 586C>T  | Arg196*      | Missense        | COSM10705       |
| T24           | PIK3CA | 1624G>A | Glu542Lys    | Missense        | COSM760         |

|     |        |                              |                                       |               |                                           |
|-----|--------|------------------------------|---------------------------------------|---------------|-------------------------------------------|
| T24 | PDGFRA | 827C>T                       | Thr276Met                             | Missense      | COSM1540243                               |
| T25 | KRAS   | 34G>C                        | Gly12Arg                              | Missense      | COSM518                                   |
| T25 | PIK3CA | 3140A>G                      | His1047Arg                            | Missense      | COSM775                                   |
| T25 | TP53   | 694A>T                       | Ile232Phe                             | Missense      | COSM562650                                |
| T27 | ATM    | 5558A>T                      | Asp1853Val                            | Missense      | COSM3752120                               |
| T27 | ATR    | 2875G>A<br>2290A>G<br>946G>A | Val959Met,<br>Lys764Glu,<br>Val316Ile | Missense      | COSM1579027<br>COSM5020937<br>COSM1579030 |
| T27 | EGFR   | G761A                        | Arg254Lys                             | Missense      | COSM5830713                               |
| T27 | ERBB2  | 1960A>G                      | Ile654Val                             | Missense      | COSM6854579                               |
| T27 | KDR    | 889G>A                       | Val297Ile                             | Missense      | COSM1131107                               |
| T27 | MPL    | 340G>A                       | Val144Met                             | Missense      | COSM3996746                               |
| T27 | PDGFRA | 1432T>C                      | Ser478Pro                             | Missense      |                                           |
| T27 | RET    | 166C>A                       | Lys56Met                              | Missense      | COSM6493950                               |
| T28 | MDM2   | 428G>A                       | Asp140Asn                             | Missense      |                                           |
| T28 | TP53   | 836_848delGGAGAGACCGGCG      | Gly279AlafsTer62                      | Frameshift    |                                           |
| T29 | PIK3CA | 1633G>C                      | Glu545Gln                             | COSM27133     | COSM27133                                 |
| T29 | TP53   | 375G>T                       |                                       | Splice region | COSM381996                                |
| T29 | TP53   | 825T>A                       | Val272Glu                             | Missense      | COSM44580                                 |

**Table S3. Detected mutations in genes checked in the OncoAMP panel, related to Figure 3.** Details of mutation detected by (targeted) sequencing of the organoid lines.

**Table S6. Patient information for correlation between in vitro organoid response to RT and patient clinical response.**

| organoid/<br>patient | tumor<br>location | tumor<br>stage | primary surgery                                                                                                                        | primary /<br>adjuvant RT                                                    | indication for<br>adjuvant RT                                                                    | RT<br>dose | last check<br>of<br>response<br>(after end<br>RT) | timing of<br>first<br>indication<br>of relapse<br>after RT | details                                                                                                     | organoid<br>sensitive<br>for RT | match<br>organoid<br>response/<br>patient<br>response |
|----------------------|-------------------|----------------|----------------------------------------------------------------------------------------------------------------------------------------|-----------------------------------------------------------------------------|--------------------------------------------------------------------------------------------------|------------|---------------------------------------------------|------------------------------------------------------------|-------------------------------------------------------------------------------------------------------------|---------------------------------|-------------------------------------------------------|
| T1                   | tongue            | T2N2b          | excision of primary tumor,<br>selective neck dissection level I-<br>IV right and reconstruction with<br>free radial forearm flap       | adjuvant                                                                    | positive resection<br>margins,<br>multiple lymph node<br>metastases with<br>extranodal extension | 66 Gy      | 12<br>months                                      | 6 months                                                   | succumbed to<br>locoregional and<br>distant disease<br>12 months after RT<br>completion                     | no                              | yes                                                   |
| T2                   | larynx            | T2N0           |                                                                                                                                        | primary                                                                     |                                                                                                  | 60 Gy      | 18<br>months                                      | 4 months                                                   | total laryngectomy for<br>recurrence, thereafter<br>no evidence of disease                                  | no                              | yes                                                   |
| T3                   | larynx            | T3N0           |                                                                                                                                        | primary                                                                     |                                                                                                  | 48 Gy*     | 5 months                                          | n.a.                                                       | succumbed to lung<br>adenocarcinoma<br>5 months after end of<br>RT without signs of<br>laryngeal recurrence | yes                             | yes                                                   |
| T5                   | parotid<br>gland  | T4aN0          | parotidectomy                                                                                                                          | adjuvant                                                                    | positive margins                                                                                 | 66 Gy      | 11<br>months                                      | n.a.                                                       | no evidence of disease                                                                                      | yes                             | yes                                                   |
| T8                   | gingiva           | T4aN0          | excision of primary tumor<br>with marginal mandibula<br>resection and selective neck<br>dissection level I-III left                    | adjuvant                                                                    | positive margins                                                                                 | 66 Gy      | 6 months                                          | n.a.                                                       | no evidence of disease                                                                                      | no                              | no                                                    |
| T25                  | floor of<br>mouth | T2N1           | excision of primary tumor,<br>selective neck dissection level I-<br>III both sides and reconstruction<br>with free radial forearm flap | adjuvant after<br>complete neck<br>dissection because of<br>neck recurrence | recurrence neck                                                                                  | 52 Gy      | 2 months                                          | 1 month                                                    | succumbed to<br>metastases neck, skin,<br>lungs and liver                                                   | no                              | yes                                                   |
| T27                  | floor of<br>mouth | T3N1           | excision of primary tumor and<br>sentinel node biopsy                                                                                  | adjuvant                                                                    | close surgical margins<br>and positive sentinel<br>node                                          | 56         | 2 months                                          | n.a.                                                       | no evidence of disease                                                                                      | yes                             | yes                                                   |

\* limited RT dose because of diagnosis of second primary lung adenocarcinoma

**Table S6.** Patient information for correlation between in vitro organoid response to RT and patient response, related to Figure 6.

**Table S7. Antibodies used for immunohistochemistry**

| protein      | Supplier   | Ordernumber | Host Species | Clone | Lotnumber   | Dilution       | Pretreatment           |
|--------------|------------|-------------|--------------|-------|-------------|----------------|------------------------|
| KRT5         | Novocastra | NCL-L-CK5   | Mouse        | XM26  | 6027941     | Ventana 1:200  | CC1 24' (EDTA) Ventana |
| MKI67        | Monosan    | MONX10293   | Mouse        | MM1   | 10293       | 1:2000         | Citrate autoclave      |
| TP40         | Abcam      | ab172731    | Rabbit       | BC28  | GR322490-1  | Ventana 1:50   | CC1 48'/ 32'AB         |
| P53          | DAKO       | M7001       | Mouse        | DO-7  | 95381       | Ventana 1:6000 | CC1 24' (EDTA) Ventana |
| P63          | Abcam      | AB735       | Mouse        | 4AB   | AB735       | 1:800          | Citrate                |
| Human nuclei | Abcam      | AB190710    | Mouse        | NM95  | GR3199786-1 | 1:500          | Citrate autoclave      |
| KRT13        | Progen     | 10523       | Mouse        | 1C7   | 10523       | 1:100          | Citrate                |
| dTOM         | Rockland   | 600-401-379 | Rabbit       |       |             | 1:1000         | Citrate                |

**Table S7. Antibodies used for immunohistochemistry, related to method section.****Legend of supplementary Movies and Table S2, S4 and S6**

**Supplemental Movie S1. Time lapse showing organoid outgrowth after plating cells obtained from tissue digestion, related to Figure 1.** Movie is a three day timelapse of cultures isolated 24h before the start of the movie for primary tissue.

**Supplemental Movie S2. Outgrowth of organoids from single cells or clumps of cells after splitting an established organoid line, related to Figure 1.** Movie is a three day timelapse of organoids that were splitted 2 hours prior to the start of imaging with TrypLE.

**Supplemental Movie S3. Infection of organoids with dTOM-HSV, related to Figure 1.** Movie is a 62 hours timelapse of organoids infected one hour before the start of imaging with dTOM-HSV. Scalebar 500 µm.

**Supplemental Movie S4. Example of a timelapse movie of H2B-mNEON N1 organoids, used to quantify segregation errors during mitosis, related to Figure 4.** Color in the left panel indicates depth. Scalebar 20 µm.

**Supplemental Movie S5. Example of a timelapse movie of H2B-mNEON N1 organoids, used to quantify segregation errors during mitosis, related to Figure 4.** Color in the left panel indicates depth. Scalebar 20 µm.

**Table S2. DEseq2 analysis results comparing tumoroid samples versus normal wildtype organoids, related to Figure 2.**

**Table S4. Mutations detected in T5 and T8 organoids and corresponding tumor tissue by whole exome sequencing, related to Figure 3.**

**Table S5. DEseq2 analysis identifying differential gene expression analysis performed on organoids responding well or poorly to cisplatin/carboplatin, cetuximab or radiotherapy, related to Figure 6.**
